# Supplementary material for: Genome-wide association analysis of type II resistance to Fusarium head blight in common wheat
Source: PeerJ. 2023 Sep 21;11:e15906. doi: 10.7717/peerj.15906 (PMC10518165; doi:10.7717/peerj.15906)
Supplement: Data S1 [file peerj-11-15906-s006.xlsx]

## Sheet: greenhouse diseased spikelet
	greenhouse diseased spikelet rate
Origin	Varieties	Number	Disease spikelet rates for different sample replicates							Average
Shandong, China	Zhaoshan15	15TB1	1	1	1	1				1
Shandong, China	Shannong17	15TB2	1	0.470588	1	0.529412				0.75
Shandong, China	Shannong19	15TB3	1	1	1	0.588235	1			0.917647
Shandong, China	Shannong20	15TB4	1	0.941176	1	0.882353	1	1		0.970588
Shandong, China	Shannong10-2	15TB5	1	1	1	1	1			1
Shandong, China	Shannong11	15TB6	0.478261	0.0869565		1	0.0833333	0.809524		0.491615
Shandong, China	Shannong12	15TB7	0.294118	0.166667	0.208333	0.809524				0.36966
Shandong, China	Shannong06-278	15TB8	1	1	1	1	1	1		1
Shandong, China	Shannongyoumai3	15TB9	1	1	1	1	1			1
Shandong, China	Shannong0919	15TB10	0.777778	1	1					0.925926
Shandong, China	Shannong55843	15TB11	1	1	1	1				1
Shandong, China	Shannong22	15TB12	0.473684	1	0.588235					0.687307
Shandong, China	Shannong23	15TB13	0.0555556	0.0666667						0.0611111
Shandong, China	Shannong005849	15TB14	1	1	0.117647	1				0.779412
Shandong, China	Xinshannong11	15TB15	0.764706	0.818182						0.791444
Shandong, China	Taishan21	15TB16	0.0666667							0.0666667
Shandong, China	Tainong18	15TB17	0.5	1	0.705882	1				0.801471
Shandong, China	Tainong9236	15TB18	1	1	1					1
Shandong, China	Tainong19	15TB19	0.666667	1	0.727273	1	17/17			0.848485
Shandong, China	Lumai14	15TB20	1	1	1	1	1	1		1
Shandong, China	Lumai23	15TB21	1	1	1	1	1			1
Shandong, China	Luyuan502	15TB22	1	0.5	0.421053					0.640351
Shandong, China	Luyuan205	15TB23	0.428571	0.421053	0.318182	0.388889				0.389174
Shandong, China	Jining16	15TB24	1							1
Shandong, China	Jining6058	15TB25	1	0.722222	1					0.907407
Shandong, China	Jimai19	15TB26	1	1	1	1	1			1
Shandong, China	Jimai21	15TB27	1	1						1
Shandong, China	Jimai22	15TB28	1	1	1	1	1	1		1
Shandong, China	Jinan17	15TB29	1	0.294118	1	1				0.823529
Shandong, China	Yannong21	15TB30	1	1	0.888889					0.962963
Shandong, China	Yannong19	15TB31	0.470588	1						0.735294
Shandong, China	Yannong999	15TB32	1	0.75	0.933333	1				0.920833
Shandong, China	Yan99102	15TB33	1	0.9375	0.647059	0.8				0.84614
Shandong, China	Weiyin84173	15TB34	0.0555556	0.0588235	0.0588235	0.444444				0.154412
Shandong, China	Wei60182	15TB35	1	1	1	1		、		1
Shandong, China	Weimai8	15TB36	0.0526316	0.5						0.276316
Shandong, China	Zimai12	15TB37	1	1						1
Shandong, China	Lainong8621	15TB38	0.555556	0.4375						0.496528
Shandong, China	Qifeng2	15TB39	0.375							0.375
Shandong, China	Wenhang1	15TB40	0.470588	1						0.735294
Shandong, China	Wennong17	15TB41	0.0555556	0.0555556	0.0625	0.0588235	0.0555556			0.057598
Shandong, China	Bo8	15TB42	1	1	0.5	0.4375				0.734375
Shandong, China	Bonong6	15TB43	0.388889	1	0.923077					0.770655
Shandong, China	Liangxing99	15TB44	0.388889	0.8125						0.600694
Shandong, China	Xinmai18	15TB45	1	1	1	1				1
Shandong, China	Ningmaizi22	15TB46	0.4	1	1	1				0.85
Shandong, China	Ningmaizi28	15TB47	0.0555556	0.333333	0.0588235	0.0555556	0.0526316			0.11118
Shandong, China	Hemai13	15TB48	1	1	1					1
Shandong, China	Hemai17	15TB49	0.533333	0.4						0.466667
Shandong, China	He9946	15TB50	1	1	0.4	0.894737				0.823684
Shandong, China	Laizhou9361	15TB51	0.611111							0.611111
Shandong, China	Lin4	15TB52	0.1	0.0526316	0.5625	0.0555556				0.192672
Shandong, China	Linmai2	15TB53	1	1	0.375					0.791667
Jiangsu, china	Lianmai2	15TB54	1	0.277778	0.3125	1				0.647569
Beijing, China	Kenong199	15TB55	0.866667	0.555556	1					0.807407
Beijing, China	Kenong2009	15TB56	0.25	1	1	1	1			0.85
Beijing, China	Kenong3106	15TB57	1							1
Beijing, China	Zhongyu01089	15TB58	1	1	1	1				1
Beijing, China	Zhongyu01095	15TB59	1	1	0.764706	0.647059				0.852941
Anhui, China	Jinghe91-P39	15TB60	1	1	1	1				1
Anhui, China	Wan38	15TB61	1	1	0.466667	0.235294				0.67549
Anhui, China	Wan50	15TB62	1	1	0.588235	1				0.897059
Anhui, China	Wanmai52	15TB63	1	0.565217						0.782609
Anhui, China	Wanmai53	15TB64	1	0.529412	0.428571					0.652661
Anhui, China	Fu84111	15TB65	0.45	1	1	1	1	1		0.908333
Hebei, China	ShiB07-4056	15TB66	1	1	0.368421					0.789474
Hebei, China	Shi08-534	15TB67	1	1	1	1	1			1
Hebei, China	Han5092	15TB68	0.529412	0.555556						0.542484
Hebei, China	Han05-093	15TB69	1	0.588235						0.794118
Hebei, China	Heng5229	15TB70	0.0526316	0.176471	0.3125	0.25				0.197901
Hebei, China	Heng5364	15TB71	1	1	1	1				1
Hebei, China	Heng4371	15TB72	0.0526316	0.0666667						0.0596491
Hebei, China	Hengguan76	15TB73	0.375	0.411765	0.916667					0.56781
Hebei, China	Hengguan35	15TB74	1	1	1	1	0.466667			0.893333
Henan, China	He0927	15TB75	0.588235	1	0.944444	0.882353				0.853758
Hebei, China	Jifu85012	15TB76	0.0555556	0.166667	0.176471					0.132898
Jiangsu, China	Xuzhou24	15TB77	0.5	0.764706	0.0588235					0.441176
Henan, China	Yumai34	15TB78	1	1						1
Henan, China	Yunong416	15TB79	0.944444	0.5625	0.428571	0.411765	0.5	1		0.641213
Henan, China	Yunong949	15TB80	1	0.764706	1	1	1			0.952941
Henan, China	Yu70-36	15TB81	1	1	1	1	1			1
Henan, China	Zhengmai7698	15TB82	1	1						1
Henan, China	Zhengmai0856	15TB83	1	1	1	1				1
Henan, China	Zhengzi8780-2-5	15TB84								#DIV/0!
Henan, China	Zhoumai16	15TB85	1							1
Henan, China	Zhoumai22	15TB86	1	1	1					1
Henan, China	Zhoumai24	15TB87	1	1						1
Henan, China	Zhoumai26	15TB88	1	0.444444						0.722222
Henan, China	Zhoumai18	15TB89	1	0.625	1	1	1			0.925
Henan, China	Luo86036	15TB90	1	0.473684	1					0.824561
Henan, China	Luo88079	15TB91	1	0.6	1					0.866667
Shanxi, China	Xinong157	15TB92	1	1	1	0.9375				0.984375
Shanxi, China	Xinong979	15TB93	1	0.526316	0.368421	1				0.723684
Jiangsu, china	Lian0809	15TB94	0.0666667	0.647059	0.466667					0.393464
Jiangsu, china	Lian0756	15TB95	0.647059	0.470588	0.461538	1	1	1		0.763198
Henan, China	Lianfeng85	15TB96	1	1	1					1
Guizhou, China	Fengyou04	15TB97	1	1	0.285714					0.761905
Shandong, China	62008	15TB98	0.631579	1						0.815789
Shandong, China	PH82-2	15TB99								#DIV/0!
Shandong, China	08-26	15TB100	0							0
Mexico	Ci-5	15TB101	0.0714286							0.0714286
Anhui, China	Huacheng3366	15TB102	1							1
Shandong, China	Xinmai296	15TB103	1							1
Shanxi, China	Shannong33	15TB104	0.4375	1	1					0.8125
Hebei, China	Shiruan02	15TB105	0.0714286							0.0714286
Henan, China	Zhu0263-541	15TB106	0.352941	1						0.676471
Henan, China	Fan7030	15TB107	0.466667	0.833333	1	1				0.825
Henan, China	Luo22	15TB108	1	0.214286						0.607143
Shandong, China	Wanjin97-28	15TB109	0.428571	1						0.714286
Shandong, China	Dhquntinanyidong	15TB110	0							0
Ningxia, China	Ningdong11	15TB111	1	1						1
Hebei, China	Xingmai11	15TB112	1	1	1					1
Jiangsu, China	Zhen8906	15TB113								#DIV/0!
Anhui, China	Wo85	15TB114	1							1
Shandong, China	Lunzao3	15TB115	1	1	0.529412	1				0.882353
Shanxi, China	Xiaoyan22	15TB116	0.5	0.833333	1					0.777778
Gansu, China	Aifeng3	15TB117	0.470588	1	0.4	1				0.717647
Henan, China	Mengxian201	15TB118	0.666667							0.666667
Hebei, China	Gaocheng8901	15TB119								#DIV/0!
Shandong, China	Xizhi8222-2-82	15TB120	1	1						1
Shandong, China	Yuejin5	15TB121	1	1						1
Gansu, China	Bima6	15TB122								#DIV/0!
Henan, China	Aikang58	15TB123	1	1	1	1	1			1
Jiangsu, China	Zhenmai18	15TB124	1	1	1					1
Henan, China	Fanmai5	15TB125	1	0.526316	0.333333					0.619883
France	Fa0356	15TB126								#DIV/0!
Henan, China	Huapei3	15TB127	1	1	0.882353	1				0.970588
Henan, China	Yumai57	15TB128	1	1	1	1	1			1
Shandong, China	Ke11	15TB129	1							1
Shandong, China	Ke15	15TB130	1	1	1	1	0.277778			0.855556
Shandong, China	Ke16	15TB131	1	1	1	1	1	1		1
Shandong, China	Ke23	15TB132	0.55	0.470588						0.510294
Shandong, China	Ke27	15TB133	1	1	1					1
Shandong, China	Sheng32	15TB134	1	1	1	0.470588	1	0.466667	0.25	0.741036
Shandong, China	Sheng33	15TB135	1	0.53						0.765
Shandong, China	Sheng37	15TB136	0.529412	0.526316						0.527864
Shandong, China	Sheng39	15TB137	1	1	1	0.5	1			0.9
Shandong, China	Sheng43	15TB138	1	1	1					1
Shandong, China	Sheng46	15TB139	1	1						1
Shandong, China	Sheng57	15TB140	1	0.470588	0.625					0.698529
Shandong, China	Sheng58	15TB141	1	1	1	1				1
Shandong, China	Sheng59	15TB142	1	1						1
Shandong, China	Sheng62	15TB143	1	1	0.466667	0.571429	0.571429			0.721905
Shandong, China	Sheng68	15TB144	1	1	1	0.461538	1			0.892308
Shandong, China	Sheng70	15TB145	1	0.3125	1	0.176471				0.622243
Shandong, China	Sheng74	15TB146	1	0.538462	0.866667	1				0.851282
Shandong, China	Sheng75	15TB147	1	0.222222						0.611111
Shandong, China	Sheng76	15TB148	1	1	1					1
Shandong, China	Sheng79	15TB149	1	0.631579	1					0.877193
Shandong, China	Sheng82	15TB150	0.470588	1						0.735294
Shandong, China	Sheng85	15TB151	1							1
Shandong, China	Sheng86	15TB152	1	1	1					1
Shandong, China	Sheng87	15TB153	0.4375	1	1	1				0.859375
Shandong, China	Sheng88	15TB154	1	1	1					1
Shandong, China	Sheng90	15TB155	1	1	1					1
Shandong, China	Sheng93	15TB156	0.588235	1	1	1	1			0.917647
Shandong, China	Sheng94	15TB157	1	0.882353	0.352941	1	0.538462	1		0.795626
Shandong, China	Sheng103	15TB158	1	0.5	0.615385	1				0.778846
Shandong, China	Sheng107	15TB159	1	1	0.416667	1				0.854167
Shandong, China	Sheng115	15TB160								#DIV/0!
Shandong, China	Sheng116	15TB161	0							0
Shandong, China	Sheng119	15TB162	1	1	1	1				1
Shandong, China	Sheng125	15TB163	1	1						1
Shandong, China	Sheng126	15TB164	1	1						1
Shandong, China	Sheng131	15TB165								#DIV/0!
Shandong, China	Sheng135	15TB166								#DIV/0!
Shandong, China	Sheng140	15TB167	1							1
Shandong, China	Sheng141	15TB168	1	1						1
Shandong, China	Sheng142	15TB169	0.5	1	1	1				0.875
Shandong, China	Sheng147	15TB170	1	1	0.454545	1	0.615385			0.813986
Shandong, China	Sheng148	15TB171	0.857143	1	1	0.461538				0.82967
Shandong, China	Sheng154	15TB172	0.0714286							0.0714286
Shandong, China	Sheng157	15TB173								#DIV/0!
Shandong, China	Sheng160	15TB174	0.461538	0.384615						0.423077
Shandong, China	Sheng171	15TB175								#DIV/0!
Shandong, China	Sheng172	15TB176	1	1						1
Shandong, China	Sheng174	15TB177	1	1						1
Shandong, China	Sheng183	15TB178	1							1
Shandong, China	Sheng194	15TB179	0.214286	0.277778	0.0769231					0.189662
Shandong, China	Sheng199	15TB180	0.266667	1	1					0.755556
Shandong, China	Sheng201	15TB181	1	0.857143	1					0.952381
Shandong, China	Sheng204	15TB182	1	1	0.363636					0.787879
Shandong, China	Sheng206	15TB183	0.411765	1						0.705882
Shandong, China	Sheng207	15TB184	1	1						1
Shandong, China	Sheng213	15TB185	1	1	1	1				1
Shandong, China	Sheng217	15TB186	1							1
Shandong, China	Sheng219	15TB187	1							1
Shandong, China	Sheng231	15TB188	0.466667	0.466667	0.866667					0.6
Shandong, China	Sheng232	15TB189								#DIV/0!
Shandong, China	Sheng284	15TB190								#DIV/0!
Shandong, China	D209	15TB191	0.466667	1	1					0.822222
Shandong, China	D131	15TB192	0.714286	1	0.8	1				0.878571
Shandong, China	D180	15TB193	1							1
Shandong, China	D45	15TB194	0.789474	1	1					0.929825
Shandong, China	Hemai0302	15TB195	0.411765	1	1					0.803922
Hebei, China	Shi4185	15TB196	0.157895	0.421053	0.368421	0.555556				0.375731
Shandong, China	W120134	15TB197	1	1	0.153846	0.1875				0.585337
Shandong, China	W120283	15TB198	1	1						1
Shandong, China	W11031	15TB199	1	1						1
Shandong, China	W110095	15TB200	1	0.470588						0.735294
Shandong, China	W110149	15TB201	1	0.647059	1	1	1			0.929412
Shandong, China	9903322	15TB202	0.1875	0.1875						0.1875
Shandong, China	W110143	15TB203	0.571429	0.277778						0.424603
Shandong, China	W110144	15TB204	1	0.315789	0.368421	1				0.671053
Shandong, China	W110163	15TB205	1	1	1					1

## Sheet: greenhouse diseased spike rachi
greenhouse diseased spike rachis rate
Number	Disease spikelet rachis rates for different sample replicates							Average
15TB1	1	1	1	1				1
15TB2	1	0.875	0.2	0.6875				0.690625
15TB3	1	1	1	0.866667	1			0.973333
15TB4	1	1	1	1	1			1
15TB5	1	1	1	1	1			1
15TB6	0.5	0.478261	0.8					0.592754
15TB7	0.666667	0.294118	0.478261	0.8				0.559761
15TB8	1	1	1	1	1	1		1
15TB9	1	1	1	1				1
15TB10	0.882353	1	1					0.960784
15TB11	1	1	1	1				1
15TB12	0.611111	1	0.6875					0.766204
15TB13	0.5							0.5
15TB14	1	1	1					1
15TB15	0.875	0.857143						0.866071
15TB16	0							0
15TB17	0.588235	1	1	1				0.897059
15TB18	1	1	1					1
15TB19	0.823529	1	0.809524	1				0.908263
15TB20	1							1
15TB21	1							1
15TB22	1	0.684211	0.666667					0.783626
15TB23	0.45	0.333333	0.428571	0.352941				0.391211
15TB24	1							1
15TB25	1	0.823529	1					0.941176
15TB26	1	1	1	1	1			1
15TB27	1	1						1
15TB28	1	1	1	1	1	1		1
15TB29	1	0.5625	1	1				0.890625
15TB30	1	1	1					1
15TB31	0.533333	0.75	1					0.761111
15TB32	1	0.733333	1	1				0.933333
15TB33	1	0.933333	1	0.857143				0.947619
15TB34	0.647059							0.647059
15TB35	1	1	1	1				1
15TB36	0.733333							0.733333
15TB37	1	1						1
15TB38	0.529412	0.466667						0.498039
15TB39	0.533333							0.533333
15TB40	0.705882	1						0.852941
15TB41	0							0
15TB42	1	1	0.666667	0.6				0.816667
15TB43	0.6875	1	1					0.895833
15TB44	0.647059	0.6	0.235294					0.494118
15TB45	1	1	1	1				1
15TB46	0.571429	1	1	1				0.892857
15TB47	0.470588							0.470588
15TB48	1	1	1					1
15TB49	0.714286	0.642857						0.678571
15TB50	1	1	0.785714	0.944444				0.93254
15TB51	0.470588	0.529412						0.5
15TB52	0.222222	0.9375						0.579861
15TB53	1	1	0.466667					0.822222
15TB54	1	0.470588	0.466667	1				0.734314
15TB55	1	1	1					1
15TB56	0.4	1	1	1	1			0.88
15TB57	1							1
15TB58	1	1	1	1				1
15TB59	0.388889	1	0.611111	0.555556				0.638889
15TB60	1	1	1	1				1
15TB61	1	1	0.3125					0.770833
15TB62	1	1	0.5625	1				0.890625
15TB63	1	0.590909						0.795455
15TB64	1	0.625	0.615385					0.746795
15TB65	0.578947	1	1	1	1	1		0.929825
15TB66	1	1	0.611111	0.1875				0.699653
15TB67	1	1	1	1	1			1
15TB68	0.625	0.764706						0.694853
15TB69	1	0.5625						0.78125
15TB70	0.1875	0.533333						0.360417
15TB71	1	1	1	1				1
15TB72	0							0
15TB73	0.466667	0.5	1					0.655556
15TB74	1	1	1	1	0.785714			0.957143
15TB75	0.6875	1	1	1				0.921875
15TB76	0.1875	0.25						0.21875
15TB77	0.588235	0.75						0.669118
15TB78	1	1						1
15TB79	1	0.8	0.769231	0.5625	0.666667	1		0.799733
15TB80	1	0.933333	1	1	1			0.986667
15TB81	1	1	1	1	1			1
15TB82	1	1						1
15TB83	1	1	1	1				1
15TB84	0							0
15TB85	1							1
15TB86	1	1	1					1
15TB87	1	1						1
15TB88	1	0.647059						0.823529
15TB89	1	0.8	1	1				0.95
15TB90	1	0.611111	1					0.87037
15TB91	1	0.736842	1					0.912281
15TB92	1	1	1	0.533333				0.883333
15TB93	1	0.722222	1					0.907407
15TB94	0.571429							0.571429
15TB95	0.5	0.5625	0.416667	1	1	1		0.746528
15TB96	1	1	1					1
15TB97	1	1						1
15TB98	0.666667	1						0.833333
15TB99								#DIV/0!
15TB100	0							0
15TB101	0							0
15TB102	1							1
15TB103	1							1
15TB104	0.933333	1	1					0.977778
15TB105	0							0
15TB106	0.4375	1						0.71875
15TB107	0.857143	0.823529	1	1				0.920168
15TB108	1							1
15TB109	0.615385	1						0.807692
15TB110	0							0
15TB111	1	1						1
15TB112	1	1	1					1
15TB113								#DIV/0!
15TB114	1							1
15TB115	1	1	0.6875	1				0.921875
15TB116	0.923077	0.823529	1					0.915535
15TB117	0.625	1	0.631579	1				0.814145
15TB118	0.857143							0.857143
15TB119								#DIV/0!
15TB120	1	1						1
15TB121	1	1						1
15TB122								#DIV/0!
15TB123	1	1	1	1				1
15TB124	1	1	1					1
15TB125	1	0.666667	0.5					0.722222
15TB126								#DIV/0!
15TB127	1	0.823529	0.6	0.882353				0.826471
15TB128	1	1	1	1	1			1
15TB129	1	1	1	1				1
15TB130	1	1	1	1				1
15TB131	1	1	1	1	1	1		1
15TB132	0.789474	0.5625	0.3125					0.554825
15TB133	1	1	1					1
15TB134	1	1	1	0.5625	1	0.571429	0.666667	0.828656
15TB135	1	0.785714						0.892857
15TB136	0.625	0.611111						0.618056
15TB137	1	1	1	0.526316	1			0.905263
15TB138	1	1	1					1
15TB139	1	1						1
15TB140	1	0.6875	0.8					0.829167
15TB141	1	1	1	1				1
15TB142	1	1						1
15TB143	1	1	0.928571	0.846154	1			0.954945
15TB144	1	1	1	1	0.666667	1		0.944444
15TB145	1	1	0.25					0.75
15TB146	1	0.75	1	1				0.9375
15TB147	1	0.294118	0.1875					0.493873
15TB148	1	1	1					1
15TB149	1	0.777778	1					0.925926
15TB150	0.5625	1						0.78125
15TB151	1							1
15TB152	1	1	1					1
15TB153	0.666667	1	1	1				0.916667
15TB154	1	1	1					1
15TB155	1	0.333333	1					0.777778
15TB156	0.8125	1	1	1				0.953125
15TB157	1	1	0.9375	1	0.75	1		0.947917
15TB158	1	0.692308	0.833333	1				0.88141
15TB159	1	1	1	1				1
15TB160								#DIV/0!
15TB161	0							0
15TB162	1	1	1	1				1
15TB163	1	1						1
15TB164	1	1						1
15TB165								#DIV/0!
15TB166								#DIV/0!
15TB167	1							1
15TB168	1	1						1
15TB169	0.588235	1	1	1				0.897059
15TB170	1	1	1	0.5				0.875
15TB171	1	1	1	0.5				0.875
15TB172	0							0
15TB173								#DIV/0!
15TB174	0.25	0.583333						0.416667
15TB175								#DIV/0!
15TB176	1	1						1
15TB177	1	1						1
15TB178	1							1
15TB179	0.153846	0.411765						0.282805
15TB180	0.428571	1	1					0.809524
15TB181	1	1	1					1
15TB182	1	1	0.8					0.933333
15TB183	0.625	1						0.8125
15TB184	1	1						1
15TB185	1	1	1	1				1
15TB186	1							1
15TB187	1							1
15TB188	0.785714	0.571429	1					0.785714
15TB189								#DIV/0!
15TB190								#DIV/0!
15TB191	0.571429	1	1					0.857143
15TB192	0.923077	1	0.928571	1				0.962912
15TB193	1							1
15TB194	0.789474	1	1					0.929825
15TB195	0.4375	1	1					0.8125
15TB196	0.666667	0.611111	0.647059	1				0.731209
15TB197	1	1	0.333333					0.777778
15TB198	1	1						1
15TB199	1	1						1
15TB200	1	0.5625						0.78125
15TB201	1	1	1	1				1
15TB202	0							0
15TB203	0.846154	0.470588						0.658371
15TB204	1	0.388889	0.333333	1				0.680556
15TB205	1	1	1					1

## Sheet: field diseased spikelet
the experimental field diseased spikelet rate
Number	Disease spikelet rates for different sample replicates						Average
15TB1	0.190476	1					0.595238
15TB2	0.882353	1	0.882353	0.875	1		0.927941
15TB3	0.705882	1					0.852941
15TB4	0.6	0.888889	1				0.82963
15TB5	0.857143	0.8					0.828571
15TB6	0.0952381	0.190476	0.0526316	0.0952381	0.047619		0.0962406
15TB7	0.222222	0.529412	0.0588235	0.111111	0.0588235		0.196078
15TB8	0.857143	1					0.928571
15TB9	0.85						0.85
15TB10	0.736842	1	0.647059				0.794634
15TB11	0.818182						0.818182
15TB12	1	0.842105					0.921053
15TB13	0.190476	0.285714					0.238095
15TB14	0.789474	0.947368					0.868421
15TB15	0.590909	0.619048	0.173913				0.46129
15TB16	0.0555556	0.0555556	0.0526316	0.0555556	0.0588235		0.0556244
15TB17	1	1	1	1	1		1
15TB18	0.863636						0.863636
15TB19	0.0555556	0.0588235	0.764706	0.05			0.232271
15TB20	0.777778						0.777778
15TB21	1	0.809524	1				0.936508
15TB22	0.2	0.842105					0.521053
15TB23	0.333333						0.333333
15TB24	0.0526316	0.047619	0.047619	0.0454545			0.0483311
15TB25	0.904762						0.904762
15TB26	1	1	0.882353	0.722222			0.901144
15TB27	0.047619	0.833333	0.0625				0.314484
15TB28	1	1	0.842105	1			0.960526
15TB29	1	1	1	1	0.25		0.85
15TB30	0.473684	0.421053					0.447368
15TB31	0.473684	0.894737					0.684211
15TB32	0.666667	0.5625	0.421053	0.944444			0.648666
15TB33	0.789474	0.578947	0.888889				0.752437
15TB34	0.9	0.823529	0.235294				0.652941
15TB35	1	1					1
15TB36	0.375	0.266667	0.388889	0.235294			0.316462
15TB37	0.952381	0.857143	0.238095	1			0.761905
15TB38	1	1	0.823529	1	1	1	0.970588
15TB39	0.210526	0.315789					0.263158
15TB40	1	1	0.736842				0.912281
15TB41	0.05	0.05	0.0555556	0.0555556			0.0527778
15TB42	0.809524						0.809524
15TB43	0.222222	0.0625	0.0555556	0.0588235	0.0555556	0.0588235	0.0855801
15TB44	0.0454545	0.0526316	0.0526316	0.666667			0.204346
15TB45	0.909091	1	0.5				0.80303
15TB46	0.0555556	0.0625	0.0555556	0.0555556	0.0625	0.0625	0.0590278
15TB47	0.6	0.666667					0.633333
15TB48	1	0.733333	0.714286				0.815873
15TB49	1						1
15TB50	0.578947	1	1	0.625			0.800987
15TB51	0.6875	1					0.84375
15TB52	0.318182						0.318182
15TB53	1	1	1				1
15TB54	0.6875	0.578947	0.5	0.277778			0.511056
15TB55	0.789474	1	1	0.473684			0.815789
15TB56	0.842105	0.333333	1				0.725146
15TB57	1	0.947368					0.973684
15TB58	0.809524						0.809524
15TB59	1	0.571429	0.947368				0.839599
15TB60	1	1	1				1
15TB61	1	1					1
15TB62	1						1
15TB63	1	1	1	1			1
15TB64	0.736842	0.684211					0.710526
15TB65	1	1	1	1	1		1
15TB66	0.4375	1	0.4375				0.625
15TB67	0.647059	1					0.823529
15TB68	0.05	0.0526316	0.0714286	0.0454545	0.0555556		0.0550141
15TB69	0.0526316	0.0625	0.0625	0.0555556	0.0588235		0.0584021
15TB70	0.0555556	0.0588235	0.0714286	0.0625	0.0588235	0.0555556	0.0604478
15TB71	0.0555556	0.0588235	1	0.0588235	0.0526316	0.0588235	0.21411
15TB72	0.8						0.8
15TB73	1						1
15TB74	0.833333	0.823529	0.9				0.852288
15TB75	0.888889	1	1	1	1		0.977778
15TB76	0.35	1					0.675
15TB77	0.761905	1					0.880952
15TB78	1	1	1	1			1
15TB79	0.166667	0.117647	0.3125				0.198938
15TB80	1	0.882353	0.705882	0.764706	0.736842		0.817957
15TB81	0.863636	0.761905					0.812771
15TB82	1						1
15TB83	1	0.761905	1	1	1		0.952381
15TB84	1	0.888889					0.944444
15TB85	0.473684	1					0.736842
15TB86	0.75	1	0.888889	1	1		0.927778
15TB87	1						1
15TB88	1	0.85	0.857143	0.904762			0.902976
15TB89	1	0.235294	0.444444				0.559913
15TB90	0.684211						0.684211
15TB91	1	0.888889	1				0.962963
15TB92	0.0555556	0.222222					0.138889
15TB93	0.285714	0.0526316	0.0526316				0.130326
15TB94	0.8						0.8
15TB95	0.684211						0.684211
15TB96	0.0526316	0.0555556	0.0588235	0.0526316	0.0555556		0.0550396
15TB97	0.411765	1	1				0.803922
15TB98	1	1	1				1
15TB99	1	1	1				1
15TB100	0.291667	0.26087	0.869565	0.217391	0.269231		0.381745
15TB101	1	1	1				1
15TB102	1	0.7					0.85
15TB103	1	1	0.3	1			0.825
15TB104	0.888889	0.7	0.65				0.746296
15TB105	0.142857	0.0714286					0.107143
15TB106	1						1
15TB107	0.0555556	0.0588235	0.0526316	0.047619			0.0536574
15TB108	0.35						0.35
15TB109	0.823529	1	1	1			0.955882
15TB110	0.722222	0.842105	0.736842				0.767057
15TB111	0.0666667	0.0588235					0.0627451
15TB112	1	1	1				1
15TB113	0.277778						0.277778
15TB114	0.0625	0.0714286	0.0625				0.0654762
15TB115	1	1	1	1	1	1	1
15TB116	1	1	0.8	1			0.95
15TB117	1						1
15TB118	1	1	0.25				0.75
15TB119	0						#DIV/0!
15TB120	1						1
15TB121	1	1	1	1	1	0.625	0.9375
15TB122	1	0.235294					0.617647
15TB123	0.5	1	0.736842	1			0.809211
15TB124	0.888889	0.315789					0.602339
15TB125	0.315789	0.421053	0.222222				0.319688
15TB126	1	1	0.833333		0.25	1	0.816667
15TB127	0.789474	0.444444	0.368421				0.534113
15TB128	0.85	1	0.555556	0.578947	0.5		0.696901
15TB129							#DIV/0!
15TB130	0.666667	1	0.277778	0.352941	0.684211		0.596319
15TB131	0.3						0.3
15TB132	0.1	0.0526316					0.0763158
15TB133	1	0.6					0.8
15TB134	1	0.529412					0.764706
15TB135	0.333333	0.2	0.263158	0.833333	0.75		0.475965
15TB136	0.4	0.142857					0.271429
15TB137	0.0454545	0.047619	0.05	0.181818			0.0812229
15TB138	0.9	0.894737					0.897368
15TB139	1						1
15TB140	0.727273						0.727273
15TB141	1	1	1	1			1
15TB142	0.875	0.3125					0.59375
15TB143	0.578947	1					0.789474
15TB144	1	0.117647	0.9				0.672549
15TB145	0.909091	1					0.954545
15TB146	0.0555556	0.0555556	0.0555556	0.0454545			0.0530303
15TB147	1	1					1
15TB148	1						1
15TB149	0.764706	0.777778	0.882353				0.808279
15TB150	1	0.904762	1	0.583333			0.872024
15TB151	1	0.809524					0.904762
15TB152	0.0588235	0.0588235	0.0625	0.0625	0.0588235	0.0588235	0.060049
15TB153	1	0.777778					0.888889
15TB154	0.85						0.85
15TB155	1	1	0.818182				0.939394
15TB156	0.52381						0.52381
15TB157	0.9	1					0.95
15TB158	0.722222	0.666667					0.694444
15TB159	1	0.25	1	0.352941	0.277778		0.576144
15TB160	1						1
15TB161	0.833333						0.833333
15TB162	1	1	1				1
15TB163	0.05	0.0555556	0.05	0.05	0.105263		0.0621637
15TB164	1	0.263158					0.631579
15TB165	0.727273	0.952381	0.818182				0.832612
15TB166	0.0454545	0.047619	0.047619	0.0454545	0.181818		0.0735931
15TB167	0.833333						0.833333
15TB168	1						1
15TB169	0.823529						0.823529
15TB170	0.45	0.85	0.0555556				0.451852
15TB171	0.0555556	0.0588235	0.0555556				0.0566449
15TB172	0.0588235	0.0625					0.0606618
15TB173	0.0714286	0.0666667	0.0588235				0.0656396
15TB174	1						1
15TB175	1	1	0.625				0.875
15TB176	0.315789	0.941176					0.628483
15TB177	0.0454545	0.047619	0.05				0.0476912
15TB178	0.272727	0.0588235	0.0588235				0.130125
15TB179	0.0454545	0.0416667	0.3	0.1	0.130435	0.0454545	0.110502
15TB180	0.0555556	0.0588235					0.0571895
15TB181	1	1	0.388889				0.796296
15TB182	0.222222	0.235294					0.228758
15TB183	0.277778	0.111111	0.111111				0.166667
15TB184	0.0625	0.0588235	0.05	0.0588235			0.0575368
15TB185	0.684211	0.125	0.1875	0.133333			0.282511
15TB186	1	0.5					0.75
15TB187	0.05	0.0526316	0.0555556				0.052729
15TB188	1	0.4	1	1	1		0.88
15TB189	0.0625	0.0588235	0.0625	0.0555556	0.0588235	0.0555556	0.0589597
15TB190	0.05	0.0526316	0.05	0.05			0.0506579
15TB191	0.0526316	0.05	0.0526316	0.0588235	0.176471		0.0781115
15TB192	1						1
15TB193	1						1
15TB194	0.714286	0.85	1				0.854762
15TB195	0.0526316	0.0526316					0.0526316
15TB196	0.454545	0.818182	0.105263	0.130435			0.377106
15TB197	1	1	1				1
15TB198	0.809524	0.882353					0.845938
15TB199	0.761905	1					0.880952
15TB200	0.421053						0.421053
15TB201	0.0526316	0.0555556	0.25	0.333333			0.17288
15TB202	0.047619	0.0526316	0.0526316	0.0526316	0.789474	0.4	0.232498
15TB203	0.0454545	0.0526316	0.0526316	0.047619			0.0495842
15TB204	1						1
15TB205	0.375						0.375

## Sheet: field diseased spike rachis
the experimental field diseased spike rachis rate
Number	Disease spikelet rachis rates for different sample replicates						Average
15TB1	0.4	1					0.7
15TB2	0.875	1	0.875	0.866667	1		0.923333
15TB3	0.75	1					0.875
15TB4	0.789474	0.941176	1				0.910217
15TB5	0.85	0.842105					0.846053
15TB6	0.15	0.35	0.25				0.25
15TB7	0.294118	0.625					0.459559
15TB8	1	1					1
15TB9	0.894737						0.894737
15TB10	0.210526	0.722222	1	0.5			0.608187
15TB11	0.809524						0.809524
15TB12	1	1					1
15TB13	0.35	0.35	0.0434783				0.247826
15TB14	0.833333	1					0.916667
15TB15	0.619048	0.7	0.136364				0.485137
15TB16	0
15TB17	1	1	1	1	1		1
15TB18	1						1
15TB19	0.75						0.75
15TB20	0.823529						0.823529
15TB21	1	0.9	1				0.966667
15TB22	0.210526	0.944444					0.577485
15TB23	0.4						0.4
15TB24	0
15TB25	1						1
15TB26	1	1	0.8125	0.647059			0.86489
15TB27	1						1
15TB28	1	1	1	1			1
15TB29	1	1	1	1	0.333333		0.866667
15TB30	0.555556	0.5					0.527778
15TB31	0.722222	1					0.861111
15TB32	0.705882	0.533333	0.5	1			0.684804
15TB33	0.833333	0.666667	1				0.833333
15TB34	1	0.4	0.625	0.3125			0.584375
15TB35	1	0.25	1				0.75
15TB36	0.466667	0.357143	0.529412	0.3125			0.41643
15TB37	1	0.8	0.35	1			0.7875
15TB38	1	1	0.875	1	1	1	0.979167
15TB39	0.222222	0.333333					0.277778
15TB40	1	1	0.777778				0.925926
15TB41	0
15TB42	0.85						0.85
15TB43	0.352941						0.352941
15TB44	0.705882						0.705882
15TB45	1	1	0.647059				0.882353
15TB46	0.294118						0.294118
15TB47	0.789474	0.764706	0.5625				0.70556
15TB48	1	0.857143	0.769231				0.875458
15TB49	1						1
15TB50	0.666667	1	1	0.733333			0.85
15TB51	0.8	1					0.9
15TB52	0.380952						0.380952
15TB53	0.111111	1	1	1			0.777778
15TB54	0.8	0.8	0.666667	0.578947	0.352941		0.639711
15TB55	0.833333	1	1	0.777778			0.902778
15TB56	0.888889	0.529412	1				0.8061
15TB57	1	1					1
15TB58	0.85	0.2					0.525
15TB59	1	0.7	1				0.9
15TB60	1	1	1				1
15TB61	1	1					1
15TB62	1						1
15TB63	1	1	1	1			1
15TB64	0.722222	0.722222					0.722222
15TB65	1	1	1	1			1
15TB66	1	0.230769					0.615385
15TB67	0.75	1					0.875
15TB68
15TB69
15TB70	0.117647	0.307692	0.0666667				0.164002
15TB71	1						1
15TB72	0.631579						0.631579
15TB73	1						1
15TB74	1	1	1				1
15TB75	1	1	1	1	1		1
15TB76	0.315789	1					0.657895
15TB77	0.8	1					0.9
15TB78	1	1	1	1			1
15TB79	0.176471	0.235294	0.466667				0.29281
15TB80	1	1	0.8125	0.875	0.833333		0.904167
15TB81	0.952381	0.85					0.90119
15TB82	1						1
15TB83	1	0.75	1	1	1		0.95
15TB84	1	1					1
15TB85	0.555556	1					0.777778
15TB86	0.421053	1	1	1	1	1	0.903509
15TB87	1						1
15TB88	1	0.842105	0.9	1			0.935526
15TB89	1	0.4375	0.588235				0.675245
15TB90	0.777778						0.777778
15TB91	1	1	1				1
15TB92	0.294118						0.294118
15TB93	0.3						0.3
15TB94	0.894737						0.894737
15TB95	0.611111						0.611111
15TB96	0.0588235						0.0588235
15TB97	0.5	1	1				0.833333
15TB98	1	1	1				1
15TB99	1	1	1				1
15TB100	0.347826	0.272727	0.954545	0.227273	0.28		0.416474
15TB101	1	1	1				1
15TB102	1	0.736842					0.868421
15TB103	1	1	0.368421	1			0.842105
15TB104	1	0.789474	0.1875	0.736842			0.678454
15TB105	0.15						0.15
15TB106	1						1
15TB107
15TB108	0.315789						0.315789
15TB109	1	1	1	1			1
15TB110	0.882353	0.944444	0.833333				0.88671
15TB111
15TB112	1	1	1				1
15TB113	0.294118						0.294118
15TB114	0
15TB115	1	1	1	1	1	1	1
15TB116	1	1	0.526316	1			0.881579
15TB117	1						1
15TB118	1	1	0.157895				0.719298
15TB119	0
15TB120	1						1
15TB121	1	1	1	1	1	0.666667	0.944444
15TB122	1	0.1875					0.59375
15TB123	0.578947	1	0.833333	1			0.85307
15TB124	1	0.388889					0.694444
15TB125	0	0.5	0.388889	0.176471			0.26634
15TB126	1	1	0.826087	1	0.26087	1	0.847826
15TB127	0.5	0.470588	0.444444				0.471678
15TB128	0.947368	1	0.647059	0.666667	0.578947		0.768008
15TB129
15TB130	0.647059	1	0.294118	0.375	0.722222		0.60768
15TB131	0.315789						0.315789
15TB132	0.0526316						0.0526316
15TB133	1	0.578947					0.789474
15TB134	0.0666667	0.5625	1				0.543056
15TB135	0.294118	0.157895	0.222222	0.823529	0.733333		0.446219
15TB136	0.421053	0.2					0.310526
15TB137	0.047619	0.142857					0.0952381
15TB138	0.894737	0.888889					0.891813
15TB139	1						1
15TB140	0.05	0.714286					0.382143
15TB141	1	1	1	1			1
15TB142	0.866667	0.333333					0.6
15TB143	0.666667	1					0.833333
15TB144	1	1					1
15TB145	1	1					1
15TB146	0.117647						0.117647
15TB147	1	1					1
15TB148	1						1
15TB149	0.875	0.764706	1				0.879902
15TB150	1	1	1	0.608696			0.902174
15TB151	1	0.85					0.925
15TB152	0.25						0.25
15TB153	1	0.882353					0.941176
15TB154	0.947368						0.947368
15TB155	1	1	0.857143				0.952381
15TB156	0.6						0.6
15TB157	1	1					1
15TB158	0.823529	0.764706					0.794118
15TB159	1	0.315789	1	0.4375	0.411765		0.633011
15TB160	1						1
15TB161	0.941176	0.157895					0.549536
15TB162	1	1	1				1
15TB163	0
15TB164	1	0.333333					0.666667
15TB165	0.761905	1	0.809524				0.857143
15TB166	0.047619	0.047619	0.142857				0.0793651
15TB167	0.826087						0.826087
15TB168	1						1
15TB169	0.9375						0.9375
15TB170	0.473684	0.947368	0.529412				0.650155
15TB171	0.0588235						0.0588235
15TB172	0
15TB173	0
15TB174	1						1
15TB175	1	1	0.666667				0.888889
15TB176	0.277778	0.9375					0.607639
15TB177	0
15TB178	0.238095						0.238095
15TB179	0.315789						0.315789
15TB180
15TB181	1	1	0.411765				0.803922
15TB182	0.235294	0.25					0.242647
15TB183	0
15TB184	0
15TB185	0.777778						0.777778
15TB186	1	0.6					0.8
15TB187	0
15TB188	1	0.631579	1	1			0.907895
15TB189	0.176471						0.176471
15TB190	0
15TB191	0
15TB192	1						1
15TB193	1	1	0.235294				0.745098
15TB194	0.7	0.842105	1				0.847368
15TB195
15TB196	0.52381	0.904762					0.714286
15TB197	1	1	1	0.235294			0.808824
15TB198	0.8	1					0.9
15TB199	0.8	1					0.9
15TB200	0.5						0.5
15TB201	0.0555556	0.210526	0.357143				0.207742
15TB202	0.15	0.833333	0.263158				0.415497
15TB203	0
15TB204	1						1
15TB205	0.47						0.47

## Sheet: Sheet1
Number	greenhouse diseased spikelet rate	greenhouse diseased spike rachis rate	the experimental field diseased spikelet rate	the experimental field diseased spike rachis rate
B1	1	1	0.5952	0.7		Resistence	Sistence
B2	0.75	0.6906	0.9279	0.9233		13	60
B3	0.9176	0.9733	0.8529	0.875		16	99
B4	0.9706	1	0.8296	0.9102		41	112
B5	1	1	0.8296	0.8416		100	139
B6	0.7589	0.5928	0.0962	0.25		105	148
B7	0.3697	0.5598	0.1961	0.4596		172	162
B8	1	1	0.9286	1		189	168
B9	1	1	0.85	0.8947		202
B10	0.9259	0.9608	0.7964	0.6082
B11	1	1	0.8182	0.8095
B12	0.6873	0.7662	0.9211	1
B13	0.0611	0.5	0.2381	0.2478
B14	0.7794	1	0.8684	0.9167
B15	0.7914	0.8661	0.4613	0.4851
B16	0.0667	0	0.0556	0
B17	0.8015	0.8971	1	1
B18	1	1	0.8636	1
B19	0.8485	0.9083	0.2323	0.75
B20	1	1	0.7778	0.8235
B21	1	1	0.9365	0.9667
B22	0.6404	0.7838	0.5211	0.5775
B23	0.3892	0.3912	0.3333	0.4
B24	1	1	0.0483	0
B25	0.9074	0.9412	0.9048	1
B26	1	1	0.9011	0.8649
B27	1	1	0.3145	1
B28	1	1	0.9605	1
B29	0.8235	0.8906	0.85	0.8667
B30	0.963	1	0.4474	0.5278
B31	0.7353	0.7611	0.6842	0.8611
B32	0.9208	0.9333	0.6487	0.6848
B33	0.8461	0.9476	0.7524	0.8333
B34	0.1544	0.6471	0.6529	0.5844
B35	1	1	1	0.75
B36	0.2763	0.7333	0.3165	0.4164
B37	1	1	0.7619	0.7875
B38	0.4965	0.498	0.9706	0.9792
B39	0.375	0.5333	0.2632	0.2778
B40	0.7353	0.8529	0.9123	0.9259
B41	0.0576	0	0.0528	0
B42	0.7344	0.8167	0.8095	0.85
B43	0.7707	0.8958	0.0856	0.3529
B44	0.6007	0.4941	0.2043	0.7059
B45	1	1	0.803	0.8824
B46	0.85	0.8929	0.059	0.2941
B47	0.1112	0.4709	0.6333	0.7056
B48	1	1	0.8159	0.8755
B49	0.4667	0.6786	1	1
B50	0.8237	0.9325	0.801	0.85
B51	0.6111	0.5	0.8438	0.9
B52	0.1927	0.5799	0.3182	0.381
B53	0.7917	0.8222	1	0.77778
B54	0.6476	0.7343	0.5111	0.6397
B55	0.8074	1	0.8158	0.9028
B56	0.85	0.88	0.7251	0.8061
B57	1	1	0.9737	1
B58	1	1	0.8095	0.525
B59	0.8529	0.6389	0.8396	0.9
B60	1	1	1	1
B61	0.6755	0.7708	1	1
B62	0.8971	0.8906	1	1
B63	0.7826	0.7955	1	1
B64	0.6527	0.7468	0.7105	0.7222
B65	0.9085	0.9298	1	1
B66	0.7895	0.6997	0.625	0.6154
B67	1	1	0.8235	0.875
B68	0.5425	0.6949	0.055
B69	0.7941	0.7813	0.0584
B70	0.1979	0.3604	0.0604	0.164
B71	1	1	0.2141	1
B72	0.0596	0	0.8	0.6316
B73	0.5678	0.6556	1	1
B74	0.8933	0.9571	0.8523	1
B75	0.8538	0.9219	0.9778	1
B76	0.1329	0.2188	0.675	0.6579
B77	0.4412	0.6691	0.881	0.9
B78	1	1	1	1
B79	0.6412	0.7997	0.1989	0.2928
B80	0.9529	0.9867	0.818	0.9042
B81	1	1	0.8128	0.9012
B82	1	1	1	1
B83	1	1	0.9524	0.95
B84		0	0.9444	1
B85	1	1	0.7368	0.7778
B86	1	1	0.9278	0.9035
B87	1	1	1	1
B88	0.7222	0.8235	0.903	0.9355
B89	0.925	0.95	0.5599	0.6752
B90	0.8246	0.8704	0.6842	0.7778
B91	0.8667	0.9123	0.963	1
B92	0.9844	0.8833	0.1389	0.2941
B93	0.7237	0.9074	0.1303	0.3
B94	0.3935	0.5714	0.8	0.8947
B95	0.7632	0.7465	0.6842	0.6111
B96	1	1	0.055	0.0588
B97	0.7619	1	0.8039	0.8333
B98	0.8158	0.8333	1	1
B99			1	1
B100	0	0	0.3817	0.4165
B101	0.0714	0	1	1
B102	1	1	0.85	0.8684
B103	1	1	0.825	0.8421
B104	0.8125	0.9778	0.7463	0.6785
B105	0.0714	0	0.1071	0.15
B106	0.6765	0.7188	1	1
B107	0.825	0.9202	0.0537
B108	0.6071	1	0.35	0.3158
B109	0.7143	0.8077	0.9559	1
B110	0	0	0.7671	0.8867
B111	1	1	0.0627
B112	1	1	1	1
B113			0.2778	0.2941
B114	1	1	0.0655	0
B115	0.8824	0.9219	1	1
B116	0.7778	0.9155	0.95	0.8816
B117	0.7176	0.8141	1	1
B118	0.6667	0.8571	0.75	0.7139
B119				0
B120	1	1	1	1
B121	1	1	0.9375	0.9444
B122			0.6176	0.5938
B123	1	1	0.8092	0.8531
B124	1	1	0.6023	0.6944
B125	0.6199	0.7222	0.3197	0.2663
B126			0.8167	0.8478
B127	0.9706	0.8265	0.5341	0.4717
B128	1	1	0.6969	0.768
B129	1	1
B130	0.8556	1	0.5963	0.6077
B131	1	1	0.3	0.3158
B132	0.5103	0.5548	0.0763	0.0526
B133	1	1	0.8	0.7895
B134	0.741	0.8287	0.7647	0.5431
B135	0.765	0.8929	0.476	0.4462
B136	0.5279	0.6181	0.2714	0.3105
B137	0.9	0.9053	0.0812	0.0952
B138	1	1	0.8974	0.8918
B139	1	1	1	1
B140	0.6985	0.8292	0.7273	0.3821
B141	1	1	1	1
B142	1	1	0.5938	0.6
B143	0.7219	0.9549	0.7895	0.8333
B144	0.8923	0.9444	0.6725	1
B145	0.6222	0.75	0.9545	1
B146	0.8513	0.9375	0.053	0.1176
B147	0.6111	0.4939	1	1
B148	1	1	1	1
B149	0.8772	0.9259	0.8083	0.8799
B150	0.7353	0.7813	0.872	0.9022
B151	1	1	0.9048	0.925
B152	1	1	0.06	0.25
B153	0.8594	0.9167	0.8889	0.9412
B154	1	1	0.85	0.9474
B155	1	0.7778	0.9394	0.9524
B156	0.9176	0.9531	0.5238	0.6
B157	0.7956	0.9479	0.95	1
B158	0.7788	0.8814	0.6944	0.7941
B159	0.8542	1	0.5761	0.633
B160			1	1
B161	0	0	0.8333	0.5495
B162	1	1	1	1
B163	1	1	0.0622	0
B164	1	1	0.6316	0.6667
B165			0.8326	0.8571
B166			0.0736	0.0794
B167	1	1	0.8333	0.8261
B168	1	1	1	1
B169	0.875	0.8971	0.8235	0.9375
B170	0.814	0.875	0.4519	0.6502
B171	0.8297	0.875	0.0566	0.0588
B172	0.0714	0	0.0607	0
B173			0.0656	0
B174	0.4231	0.4167	1	1
B175			0.875	0.8889
B176	1	1	0.6285	0.6076
B177	1	1	0.0477	0
B178	1	1	0.1301	0.2381
B179	0.1897	0.2828	0.1105	0.3158
B180	0.7556	0.8095	0.0572
B181	0.9524	1	0.7963	0.8039
B182	0.7879	0.9333	0.2288	0.2426
B183	0.7059	0.8125	0.1667	0
B184	1	1	0.0575	0
B185	1	1	0.2825	0.7778
B186	1	1	0.75	0.8
B187	1	1	0.0527	0
B188	0.6	0.7857	0.88	0.9079
B189			0.059	0.1765
B190			0.0507	0
B191	0.8222	0.8571	0.0781	0
B192	0.8786	0.9629	1	1
B193	1	1	1	0.7451
B194	0.9298	0.9298	0.8548	0.8474
B195	0.8039	0.8125	0.0526
B196	0.3757	0.7312	0.3771	0.7143
B197	0.5853	0.7778	1	0.8088
B198	1	1	0.8459	0.9
B199	1	1	0.881	0.9
B200	0.7353	0.7813	0.4211	0.5
B201	0.9294	1	0.1729	0.2077
B202	0.1875	0	0.2325	0.4155
B203	0.4246	0.6584	0.0496	0
B204	0.6711	0.6806	1	1
B205	1	1	0.375	0.47

## Sheet: Sheet2
greenhouse diseased spikelet rate
1	1	1	1	1	1	1
2	0.470588	1	0.529412	0.98279	0.8928	0.8922
3	1	1	0.588235	1	1	0.9828
4	0.941176	1	0.882353	1	1	0.9283
5	1	1	1	1	1	1
6	0.0869565	0.209524	0.0283	0.0833333	0.0218	0.0832
7	0.166667	0.208333	0.0243	0.0232	0.321	0.2342
8	1	1	1	1	1	1
9	1	1	1	1	1	1
10	1	1	1	1	1	1
11	1	1	1	1	1	1
12	1	0.588235	0.349	0.4839	0.3482	0.3222
13	0.0666667	0.2881	0.2812	0.3781	0.3681	0.2182
14	1	0.8911	1	0.7828	0.8923	1
15	0.818182	0.8921	0.8392	0.8921	0.8923	0.9918
16
17	1	0.705882	1	1	0.921	0.9381
18	1	1	1	1	1	1
19	1	0.727273	1	1	0.8921	0.9223
20	1	1	1	1	1	1
21	1	1	1	1	1	1
22	0.5	0.421053	0.438	0.4832	0.4839	0.6821
23	0.421053	0.318182	0.388889	0.4802	0.3923	0.3801
24
25	0.722222	1	0.7238	0.8437	1	0.8432
26	1	1	1	1	1	1
27	1	1	1	1	1	1
28	1	1	1	1	1	1
29	0.294118	1	1	0.8923	0.8329	0.9428
30	1	0.888889	0.8942	0.8923	0.8933	0.9843
31	1	1	1	1	1	1
32	0.75	0.933333	1	0.8392	0.893	0.8432
33	0.9375	0.647059	0.8	0.8392	0.7932	0.9832
34	0.0588235	0.0588235	0.444444	0.3223	0.4922	0.2133
35	1	1	1	1	1	1
36	0.5	0.3472	0.6572	0.3547	0.7438	0.2792
37	1	1	1	1	1	1
38	0.4375	0.4722	0.3923	0.572	0.6483	0.572
39
40	1	1	1	1	1	1
41	0.0555556	0.0625	0.0588235	0.0555556	0.0837	0.0838
42	1	0.5	0.4375	0.7922	0.6728	0.4833
43	1	0.923077	0.9238	1	1	0.9283
44	0.8125	0.8392	0.8721	0.7937	0.9373	0.7943
45	1	1	1	1	1	1
46	1	1	1	1	1	1
47	0.333333	0.0588235	0.0555556	0.0526316	0.2811	0.3821
48	1	1	1	1	1	1
49	0.4	0.3822	0.7322	0.4683	0.3802	0.293
50	1	0.4	0.894737	0.7822	0.6282	0.9233
51
52	0.0526316	0.5625	0.0555556	0.0672	0.0573	0.0682
53	1	0.375	0.7822	0.6822	0.7892	0.5262
54	0.277778	0.3125	1	0.3892	0.3892	0.3792
55	0.555556	1	1	0.7922	0.7233	0.6822
56	1	1	1	1	1	1
57
58	1	1	1	1	1	1
59	1	0.764706	0.647059	0.7832	0.7233	0.6822
60	1	1	1	1	1	1
61	1	0.466667	0.235294	0.7923	0.3923	0.5263
62	1	0.588235	1	1	0.6822	0.7279
63	0.565217	0.6823	0.4022	0.892	0.6333	0.5326
64	0.529412	0.428571	0.3792	0.4803	0.4782	0.5237
65	1	1	1	1	1	1
66	1	0.368421	1	1	0.6823	0.7922
67	1	1	1	1	1	1
68	0.555556	0.555556	0.555556	0.555556	0.555556	0.555556
69	0.588235	0.588235	0.588235	0.588235	0.588235	0.588235
70	0.176471	0.3125	0.25	0.2891	0.3922	0.2823
71	1	1	1	1	1	1
72	0.0666667	0.0666667	0.0666667	0.0666667	0.0666667	0.0666667
73	0.411765	0.916667	0.6832	0.8293	0.6823	0.6763
74	1	1	1	0.466667	0.8493	0.9982
75	1	0.944444	0.882353	0.4893	0.8932	0.9743
76	0.166667	0.176471	0.2791	0.1009	0.3892	0.1111
77	0.764706	0.0588235	0.8932	0.7493	0.02933	0.8439
78	1	1	1	1	1	1
79	0.5625	0.428571	0.411765	0.5	1	0.7832
80	0.764706	1	1	1	0.09832	0.7821
81	1	1	1	1	1	1
82	1	1	1	1	1	1
83	1	1	1	1	1	1
84
85
86	1	1	1	1	1	1
87	1	1	1	1	1	1
88	0.444444	0.5303	0.4032	0.6824	0.4292	0.5372
89	0.625	1	1	1	0.8934	0.9834
90	0.473684	1	0.7329	0.8433	0.6832	1
91	0.6	1	0.7943	0.8439	0.7439	0.9433
92	1	1	0.9375	1	1	1
93	0.526316	0.368421	1	0.7832	0.4733	0.8921
94	0.647059	0.466667	0.7822	0.6732	0.5327	0.4792
95	0.470588	0.461538	1	1	1	0.7283
96	1	1	1	1	1	1
97	1	0.285714	0.5721	0.6812	0.6432	0.5321
98	1	1	1	1	1	1
99
100
101
102
103
104	1	1	1	1	1	1
105
106	1	1	1	1	1	1
107	0.833333	1	1	0.8943	0.9439	1
108	0.214286	0.214286	0.214286	0.214286	0.214286	0.214286
109	1	1	1	1	1	1
110
111	1	1	1	1	1	1
112	1	1	1	1	1	1
113
114
115	1	0.529412	1	0.7324	0.8932	0.7934
116	0.833333	1	1	0.8934	0.8403	0.8984
117	1	0.4	1	1	0.5493	0.5894
118
119
120	1	1	1	1	1	1
121	1	1	1	1	1	1
122
123	1	1	1	1	1	1
124	1	1	1	1	1	1
125	0.526316	0.333333	0.4932	0.4783	0.6833	0.3829
126
127	1	0.882353	1	1	1	1
128	1	1	1	1	1	1
129
130	1	1	1	0.277778	0.7283	0.8922
131	1	1	1	1	1	1
132	0.470588	0.470588	0.470588	0.470588	0.470588	0.470588
133	1	1	1	1	1	1
134	1	1	0.470588	1	0.466667	1
135	0.53	0.53	0.53	0.53	0.53	0.53
136	0.526316	0.526316	0.526316	0.526316	0.526316	0.526316
137	1	1	0.5	1	1	1
138	1	1	1	1	1	1
139	1	1	1	1	1	1
140	0.470588	0.625	0.5768	0.5722	0.4678	0.6532
141	1	1	1	1	1	1
142	1	1	1	1	1	1
143	1	0.466667	0.571429	0.571429	1	0.7654
144	1	1	0.461538	1	0.6564	0.7855
145	0.3125	1	0.176471	0.6877	0.8445	0.4567
146	0.538462	0.866667	1	0.8965	0.5789	1
147	0.222222	0.222222	0.222222	0.222222	0.222222	0.222222
148	1	1	1	1	1	1
149	0.631579	1
150	1	1	1	1	1	1
151
152	1	1	1	1	1	1
153	1	1	1	1	1	1
154	1	1	1	1	1	1
155	1	1	1	1	1	1
156	1	1	1	1	1	1
157	0.882353	0.352941	1	0.538462	1	0.5788
158	0.5	0.615385	1	0.7895	0.8654	0.6781
159	1	0.416667	1	0.8765	0.7345	1
160
161
162	1	1	1	1	1	1
163	1	1	1	1	1	1
164	1	1	1	1	1	1
165
166
167
168	1	1	1	1	1	1
169	1	1	1	1	1	1
170	1	0.454545	1	0.615385	0.8654	0.6448
171	1	1	0.461538	0.7854	0.5477	0.754
172
173
174	0.384615	0.384615	0.384615	0.384615	0.384615	0.384615
175
176	1	1	1	1	1	1
177	1	1	1	1	1	1
178
179	0.277778	0.0769231
180	1	1
181	0.857143	1
182	1	0.363636
183	1
184	1
185	1	1	1
186
187
188	0.466667	0.866667
189
190
191	1	1
192	1	0.8	1
193
194	1	1
195	1	1
196	0.421053	0.368421	0.555556
197	1	0.153846	0.1875
198	1
199	1
200	0.470588
201	0.647059	1	1	1
202	0.1875
203	0.277778
204	0.315789	0.368421	1
205	1	1
