# Supplementary material for: Genome-wide association analysis of type II resistance to Fusarium head blight in common wheat
Source: PeerJ. 2023 Sep 21;11:e15906. doi: 10.7717/peerj.15906 (PMC10518165; doi:10.7717/peerj.15906)
Supplement: Data S3 [file peerj-11-15906-s008.xlsx]

## Sheet: 2017 greenhouse
2017 greenhouse diseased spikelet rate
Varieties	disease spikelet rate	Disease index	repeat 2		repeat 3		repeat 4		repeat 5		repeat 6		Disease index
Zhaoshan15	1	4	1	4	1	4	1	4	1	4	1	4	1
Shannong17	0.470588	2	1	4	0.529412	3	0.98279	4	0.8928	4	0.8922	4	0.875
Shannong19	1	4	1	4	0.588235	3	1	4	1	4	0.9828	4	0.96
Shannong20	0.941176	4	1	4	0.882353	4	1	4	1	4	0.9283	4	1
Shannong10-2	1	4	1	4	1	4	1	4	1	4	1	4	1
Shannong11	0.0869565	1	0.209524	1	0.0283	1	0.0833333	1	0.0218	1	0.0832	1	0.25
Shannong12	0.166667	1	0.208333	1	0.0243	1	0.0232	1	0.321	2	0.2342	1	0.29
Shannong06-278	1	4	1	4	1	4	1	4	1	4	1	4	1
Shannongyoumai3	1	4	1	4	1	4	1	4	1	4	1	4	1
Shannong0919	1	4	1	4	1	4	1	4	1	4	1	4	1
Shannong55843	1	4	1	4	1	4	1	4	1	4	1	4	1
Shannong22	1	4	0.588235	3	0.349	2	0.4839	2	0.3482	2	0.3222	2	0.63
Shannong23	0.0666667	1	0.2881	2	0.2812	2	0.3781	2	0.3681	2	0.2182	1	0.42
Shannong005849	1	4	0.8911	4	1	4	0.7828	4	0.8923	4	1	4	1
Xinshannong11	0.818182	4	0.8921	4	0.8392	4	0.8921	4	0.8923	4	0.9918	4	1
Taishan21
Tainong18	1	4	0.705882	3	1	4	1	4	0.921	4	0.9381	4	0.96
Tainong9236	1	4	1	4	1	4	1	4	1	4	1	4	1
Tainong19	1	4	0.727273	3	1	4	1	4	0.8921	4	0.9223	4	0.96
Lumai14	1	4	1	4	1	4	1	4	1	4	1	4	1
Lumai23	1	4	1	4	1	4	1	4	1	4	1	4	1
Luyuan502	0.5	3	0.421053	2	0.438	2	0.4832	2	0.4839	2	0.6821	3	0.58
Luyuan205	0.421053	2	0.318182	2	0.388889	2	0.4802	2	0.3923	2	0.3801	2	0.33
Jining16
Jining6058	0.722222	3	1	4	0.7238	3	0.8437	4	1	4	0.8432	4	0.58
Jimai19	1	4	1	4	1	4	1	4	1	4	1	4	1
Jimai21	1	4	1	4	1	4	1	4	1	4	1	4	1
Jimai22	1	4	1	4	1	4	1	4	1	4	1	4	1
Jinan17	0.294118	2	1	4	1	4	0.8923	4	0.8329	4	0.9428	4	0.75
Yannong21	1	4	0.888889	4	0.8942	4	0.8923	4	0.8933	4	0.9843	4	1
Yannong19	1	4	1	4	1	4	1	4	1	4	1	4	1
Yannong999	0.75	4	0.933333	4	1	4	0.8392	4	0.893	4	0.8432	4	1
Yan99102	0.9375	4	0.647059	3	0.8	4	0.8392	4	0.7932	4	0.9832	4	0.96
Weiyin84173	0.0588235	1	0.0588235	1	0.444444	2	0.3223	2	0.4922	2	0.2133	1	0.38
Wei60182	1	4	1	4	1	4	1	4	1	4	1	4	1
Weimai8	0.5	3	0.3472	2	0.6572	3	0.3547	2	0.7438	3	0.2792	2	0.63
Zimai12	1	4	1	4	1	4	1	4	1	4	1	4	1
Lainong8621	0.4375	2	0.4722	2	0.3923	2	0.572	3	0.6483	3	0.572	3	0.63
Qifeng2
Wenhang1	1	4	1	4	1	4	1	4	1	4	1	4	1
Wennong17	0.0555556	1	0.0625	1	0.0588235	1	0.0555556	1	0.0837	1	0.0838	1	0.25
Bo8	1	4	0.5	3	0.4375	2	0.7922	4	0.6728	3	0.4833	2	0.58
Bonong6	1	4	0.923077	4	0.9238	4	1	4	1	4	0.9283	4	1
Liangxing99	0.8125	4	0.8392	4	0.8721	4	0.7937	4	0.9373	4	0.7943	4	1
Xinmai18	1	4	1	4	1	4	1	4	1	4	1	4	1
Ningmaizi22	1	4	1	4	1	4	1	4	1	4	1	4	1
Ningmaizi28	0.333333	2	0.0588235	1	0.0555556	1	0.0526316	1	0.2811	2	0.3821	2	0.38
Hemai13	1	4	1	4	1	4	1	4	1	4	1	4	1
Hemai17	0.4	2	0.3822	2	0.7322	3	0.4683	2	0.3802	2	0.293	2	0.54
He9946	1	4	0.4	2	0.894737	4	0.7822	4	0.6282	3	0.9233	4	0.88
Laizhou9361
Lin4	0.0526316	1	0.5625	1	0.0555556	1	0.0672	1	0.0573	1	0.0682	1	0.25
Linmai2	1	4	0.375	2	0.7822	4	0.6822	3	0.7892	4	0.5262	3	0.83
Lianmai2	0.277778	2	0.3125	2	1	4	0.3892	2	0.3892	2	0.3792	2	0.58
Kenong199	0.555556	3	1	4	1	4	0.7922	4	0.7233	3	0.6822	3	0.88
Kenong2009	1	4	1	4	1	4	1	4	1	4	1	4	1
Kenong3106
Zhongyu01089	1	4	1	4	1	4	1	4	1	4	1	4	1
Zhongyu01095	1	4	0.764706	4	0.647059	3	0.7832	4	0.7233	3	0.6822	3	0.88
Jinghe91-P39	1	4	1	4	1	4	1	4	1	4	1	4	1
Wan38	1	4	0.466667	2	0.235294	1	0.7923	4	0.3923	2	0.5263	3	0.67
Wan50	1	4	0.588235	3	1	4	1	4	0.6822	3	0.7279	3	0.88
Wanmai52	0.565217	3	0.6823	3	0.4022	2	0.892	4	0.6333	3	0.5326	3	0.75
Wanmai53	0.529412	3	0.428571	2	0.3792	2	0.4803	2	0.4782	2	0.5237	3	0.58
Fu84111	1	4	1	4	1	4	1	4	1	4	1	4	1
ShiB07-4056	1	4	0.368421	2	1	4	1	4	0.6823	3	0.7922	4	0.88
Shi08-534	1	4	1	4	1	4	1	4	1	4	1	4	1
Han5092	0.555556	3	0.555556	3	0.555556	3	0.555556	3	0.555556	3	0.555556	3	0.75
Han05-093	0.588235	3	0.588235	3	0.588235	3	0.588235	3	0.588235	3	0.588235	3	0.75
Heng5229	0.176471	1	0.3125	2	0.25	2	0.2891	2	0.3922	2	0.2823	2	0.46
Heng5364	1	4	1	4	1	4	1	4	1	4	1	4	1
Heng4371	0.0666667	1	0.0666667	1	0.0666667	1	0.0666667	1	0.0666667	1	0.0666667	1	0.25
Hengguan76	0.411765	2	0.916667	4	0.6832	3	0.8293	4	0.6823	3	0.6763	3	0.79
Hengguan35	1	4	1	4	1	4	0.466667	2	0.8493	4	0.9982	4	0.92
He0927	1	4	0.944444	4	0.882353	4	0.4893	2	0.8932	4	0.9743	4	0.92
Jifu85012	0.166667	1	0.176471	1	0.2791	2	0.1009	1	0.3892	2	0.1111	1	0.33
Xuzhou24	0.764706	4	0.0588235	1	0.8932	4	0.7493	3	0.02933	1	0.8439	4	0.71
Yumai34	1	4	1	4	1	4	1	4	1	4	1	4	1
Yunong416	0.5625	3	0.428571	2	0.411765	2	0.5	3	1	4	0.7832	4	0.75
Yunong949	0.764706	4	1	4	1	4	1	4	0.9832	4	0.7821	4	1
Yu70-36	1	4	1	4	1	4	1	4	1	4	1	4	1
Zhengmai7698	1	4	1	4	1	4	1	4	1	4	1	4	1
Zhengmai0856	1	4	1	4	1	4	1	4	1	4	1	4	1
Zhengzi8780-2-5
Zhoumai16
Zhoumai22	1	4	1	4	1	4	1	4	1	4	1	4	1
Zhoumai24	1	4	1	4	1	4	1	4	1	4	1	4	1
Zhoumai26	0.444444	2	0.5303	3	0.4032	2	0.6824	3	0.4292	2	0.5372	3	0.63
Zhoumai18	0.625	3	1	4	1	4	1	4	0.8934	4	0.9834	4	0.96
Luo86036	0.473684	2	1	3	0.7329	3	0.8433	4	0.6832	3	1	4	0.79
Luo88079	0.6	3	1	4	0.7943	4	0.8439	4	0.7439	3	0.9433	4	0.92
Xinong157	1	4	1	4	0.9375	4	1	4	1	4	1	4	1
Xinong979	0.526316	3	0.368421	2	1	4	0.7832	4	0.4733	2	0.8921	4	0.79
Lian0809	0.647059	3	0.466667	2	0.7822	4	0.6732	3	0.5327	3	0.4792	2	0.71
Lian0756	0.470588	2	0.461538	2	1	4	1	4	1	4	0.7283	3	0.79
Lianfeng85	1	4	1	4	1	4	1	4	1	4	1	4	1
Fengyou04	1	4	0.285714	2	0.5721	3	0.6812	3	0.6432	3	0.5321	3	0.75
62008	1	4	1	4	1	4	1	4	1	4	1	4	1
PH82-2
08-26
Ci-5
Huacheng3366
Xinmai296
Shannong33	1	4	1	4	1	4	1	4	1	4	1	4	1
Shiruan02
Zhu0263-541	1	4	1	4	1	4	1	4	1	4	1	4	1
Fan7030	0.833333	4	1	4	1	4	0.8943	4	0.9439	4	1	4	1
Luo22	0.214286	1	0.214286	1	0.214286	1	0.214286	1	0.214286	1	0.214286	1	0.25
Wanjin97-28	1	4	1	4	1	4	1	4	1	4	1	4	1
Dhquntinanyidong
Ningdong11	1	4	1	4	1	4	1	4	1	4	1	4	1
Xingmai11	1	4	1	4	1	4	1	4	1	4	1	4	1
Zhen8906
Wo85
Lunzao3	1	4	0.529412	3	1	4	0.7324	3	0.8932	4	0.7934	4	0.92
Xiaoyan22	0.833333	4	1	4	1	4	0.8934	4	0.8403	4	0.8984	4	1
Aifeng3	1	4	0.4	2	1	4	1	4	0.5493	3	0.5894	3	0.83
Mengxian201
Gaocheng8901
Xizhi8222-2-82	1	4	1	4	1	4	1	4	1	4	1	4	1
Yuejin5	1	4	1	4	1	4	1	4	1	4	1	4	1
Bima6
Aikang58	1	4	1	4	1	4	1	4	1	4	1	4	1
Zhenmai18	1	4	1	4	1	4	1	4	1	4	1	4	1
Fanmai5	0.526316	3	0.333333	2	0.4932	2	0.4783	2	0.6833	3	0.3829	2	0.58
Fa0356
Huapei3	1	4	0.882353	4	1	4	1	4	1	4	1	4	1
Yumai57	1	4	1	4	1	4	1	4	1	4	1	4	1
Ke11
Ke15	1	4	1	4	1	4	0.277778	2	0.7283	3	0.8922	4	0.88
Ke16	1	4	1	4	1	4	1	4	1	4	1	4	1
Ke23	0.470588	2	0.470588	2	0.470588	2	0.470588	2	0.470588	2	0.470588	2	0.5
Ke27	1	4	1	4	1	4	1	4	1	4	1	4	1
Sheng32	1	4	1	4	0.470588	2	1	4	0.466667	2	1	4	0.83
Sheng33	0.53	3	0.53	3	0.53	3	0.53	3	0.53	3	0.53	3	0.75
Sheng37	0.526316	3	0.526316	3	0.526316	3	0.526316	3	0.526316	3	0.526316	3	0.75
Sheng39	1	4	1	4	0.5	3	1	4	1	4	1	4	0.96
Sheng43	1	4	1	4	1	4	1	4	1	4	1	4	1
Sheng46	1	4	1	4	1	4	1	4	1	4	1	4	1
Sheng57	0.470588	2	0.625	3	0.5768	3	0.5722	3	0.4678	2	0.6532	3	0.67
Sheng58	1	4	1	4	1	4	1	4	1	4	1	4	1
Sheng59	1	4	1	4	1	4	1	4	1	4	1	4	1
Sheng62	1	4	0.466667	2	0.571429	3	0.571429	3	1	4	0.7654	4	0.83
Sheng68	1	4	1	4	0.461538	2	1	4	0.6564	3	0.7855	4	0.88
Sheng70	0.3125	2	1	4	0.176471	1	0.6877	3	0.8445	4	0.4567	2	0.67
Sheng74	0.538462	3	0.866667	4	1	4	0.8965	4	0.5789	3	1	4	0.92
Sheng75	0.222222	1	0.222222	1	0.222222	1	0.222222	1	0.222222	1	0.222222	1	0.25
Sheng76	1	4	1	4	1	4	1	4	1	4	1	4	1
Sheng79	0.631579	3	1	4	1	4	0.7922	4	0.8823	4	0.6732	3	0.92
Sheng82	1	4	1	4	1	4	1	4	1	4	1	4	1
Sheng85
Sheng86	1	4	1	4	1	4	1	4	1	4	1	4	1
Sheng87	1	4	1	4	1	4	1	4	1	4	1	4	1
Sheng88	1	4	1	4	1	4	1	4	1	4	1	4	1
Sheng90	1	4	1	4	1	4	1	4	1	4	1	4	1
Sheng93	1	4	1	4	1	4	1	4	1	4	1	4	1
Sheng94	0.882353	4	0.352941	2	1	4	0.538462	3	1	4	0.5788	3	0.83
Sheng103	0.5	3	0.615385	3	1	4	0.7895	4	0.8654	4	0.6781	3	0.88
Sheng107	1	4	0.416667	2	1	4	0.8765	4	0.7345	3	1	4	0.88
Sheng115
Sheng116
Sheng119	1	4	1	4	1	4	1	4	1	4	1	4	1
Sheng125	1	4	1	4	1	4	1	4	1	4	1	4	1
Sheng126	1	4	1	4	1	4	1	4	1	4	1	4	1
Sheng131
Sheng135
Sheng140
Sheng141	1	4	1	4	1	4	1	4	1	4	1	4	1
Sheng142	1	4	1	4	1	4	1	4	1	4	1	4	1
Sheng147	1	4	0.454545	2	1	4	0.615385	3	0.8654	4	0.6448	3	0.83
Sheng148	1	4	1	4	0.461538	2	0.7854	4	0.5477	3	0.754	4	0.88
Sheng154
Sheng157
Sheng160	0.384615	2	0.384615	2	0.384615	2	0.384615	2	0.384615	2	0.384615	2	0.5
Sheng171
Sheng172	1	4	1	4	1	4	1	4	1	4	1	4	1
Sheng174	1	4	1	4	1	4	1	4	1	4	1	4	1
Sheng183
Sheng194	0.277778	2	0.0769231	1	0.0268	1	0.0372	1	0.0823	1	0.0882	1	0.29
Sheng199	1	4	1	4	1	4	1	4	1	4	1	4	1
Sheng201	0.857143	4	1	4	0.9711	4	0.9732	4	0.5712	3	0.7281	3	0.92
Sheng204	1	4	0.363636	2	0.7237	3	0.7842	4	0.863	4	0.5327	3	0.83
Sheng206	1	4	1	4	1	4	1	4	1	4	1	4	1
Sheng207	1	4	1	4	1	4	1	4	1	4	1	4	1
Sheng213	1	4	1	4	1	4	1	4	1	4	1	4	1
Sheng217
Sheng219
Sheng231	0.466667	2	0.866667	4	0.7374	3	0.5722	3	0.8643	4	0.6463	3	0.79
Sheng232
Sheng284
D209	1	4	1	4	1	4	1	4	1	4	1	4	1
D131	1	4	0.8	4	1	4	1	4	1	4	1	4	1
D180
D45	1	4	1	4	1	4	1	4	1	4	1	4	1
Hemai0302	1	4	1	4	1	4	1	4	1	4	1	4	1
Shi4185	0.421053	2	0.368421	2	0.555556	3	0.5732	3	0.4932	2	0.7382	3	0.63
W120134	1	4	0.153846	1	0.1875	1	0.2792	2	0.2384	1	0.9832	4	0.54
W120283	1	4	1	4	1	4	1	4	1	4	1	4	1
W11031	1	4	1	4	1	4	1	4	1	4	1	4	1
W110095	0.470588	2	0.470588	2	0.470588	2	0.470588	2	0.470588	2	0.470588	2	0.5
W110149	0.647059	3	1	4	1	4	1	4	0.8321	4	0.8364	4	0.96
9903322	0.1875	1	0.1875	1	0.1875	1	0.1875	1	0.1875	1	0.1875	1	0.25
W110143	0.277778	2	0.277778	2	0.277778	2	0.277778	2	0.277778	2	0.277778	2	0.5
W110144	0.315789	2	0.368421	2	1	4	0.6473	3	0.7823	4	0.6423	3	0.75
W110163	1	4	1	4	1	4	1	4	1	4	1	4	1
													0.25

## Sheet: 2017 the experimental field
2017 the experimental field diseased spikelet rate
Varieties	disease spikelet rate	Disease index	repeat 2		repeat 3		repeat 4		repeat 5		repeat 6		Disease index
Zhaoshan15	1	4	1	4	1	4	1	4	1	4	1	4	1
Shannong17	0.882353	4	1	4	0.882353	4	0.875	4	1	4	0.8736	4	1
Shannong19	0.705882	3	1	4	0.8743	4	0.9475	4	0.7943	4	0.8474	4	0.96
Shannong20	0.6	3	0.888889	4	1	4	1	4	0.9373	4	0.8364	4	0.96
Shannong10-2	0.857143	4	0.8	4	0.9837	4	0.7832	4	0.9734	4	0.6433	3	0.96
Shannong11	0.0952381	1	0.190476	1	0.0526316	1	0.0952381	1	0.047619	1	0.0273	1	0.25
Shannong12	0.222222	1	0.529412	3	0.0588235	1	0.111111	1	0.0588235	1	0.2711	2	0.38
Shannong06-278	0.857143	4	1	4	0.9394	4	0.9742	4	0.9742	4	0.7476	3	0.96
Shannongyoumai3	0.85	4	0.85	4	0.85	4	0.85	4	0.85	4	0.85	4	1
Shannong0919	0.736842	3	1	4	0.647059	3	1	4	1	4	1	4	0.92
Shannong55843	0.818182	4	0.818182	4	0.818182	4	0.818182	4	0.818182	4	0.818182	4	1
Shannong22	1	4	0.842105	4	0.5636	3	0.6732	3	0.9732	4	0.5322	3	0.88
Shannong23	0.190476	1	0.285714	2	0.3622	2	0.2612	2	0.3781	2	0.1839	1	0.33
Shannong005849	0.789474	4	0.947368	4	0.7843	4	0.9373	4	0.8632	4	0.6372	3	0.96
Xinshannong11	0.590909	3	0.619048	3	0.173913	1	0.6743	3	0.9372	4	0.4733	2	0.67
Taishan21	0.0555556	1	0.0555556	1	0.0526316	1	0.0555556	1	0.0588235	1	0.05432	1	0.25
Tainong18	1	4	1	4	1	4	1	4	1	4	1	4	1
Tainong9236	0.863636	4	0.863636	4	0.863636	4	0.863636	4	0.863636	4	0.863636	4	1
Tainong19	0.0555556	1	0.0588235	1	0.764706	4	0.05	1	0.4637	2	0.6326	3	0.5
Lumai14	0.777778	4	0.777778	4	0.777778	4	0.777778	4	0.777778	4	0.777778	4	1
Lumai23	1	4	0.809524	4	1	4	1	4	1	4	1	4	1
Luyuan502	0.2	1	0.842105	4	0.5436	3	0.6343	3	0.4683	2	0.7352	3	0.67
Luyuan205	0.333333	2	0.333333	2	0.333333	2	0.333333	2	0.333333	2	0.333333	2	0.5
Jining16	0.0526316	1	0.047619	1	0.047619	1	0.0454545	1	0.0454545	1	0.0454545	1	0.25
Jining6058	0.904762	4	0.904762	4	0.904762	4	0.904762	4	0.904762	4	0.904762	4	1
Jimai19	1	4	1	4	0.882353	4	0.722222	3	0.9372	4	0.7282	3	0.92
Jimai21	0.047619	1	0.833333	4	0.0625	1	1	4	1	4	1	4	0.58
Jimai22	1	4	1	4	0.842105	4	1	4	1	4	1	4	1
Jinan17	1	4	1	4	1	4	1	4	0.25	2	1	4	0.92
Yannong21	0.473684	2	0.421053	2	0.5894	3	0.7376	3	0.3722	2	0.3449	2	0.58
Yannong19	0.473684	2	0.894737	4	0.8723	4	0.7236	3	0.6322	3	0.8782	4	0.83
Yannong999	0.666667	3	0.5625	3	0.421053	2	0.944444	4	0.8732	4	0.8622	4	0.83
Yan99102	0.789474	4	0.578947	3	0.888889	4	0.7382	3	0.7323	3	0.8932	4	0.88
Weiyin84173	0.9	4	0.823529	4	0.235294	1	0.2389	1	0.3829	2	0.2801	2	0.58
Wei60182	1	4	1	4	1	4	1	4	1	4	1	4	1
Weimai8	0.375	2	0.266667	2	0.388889	2	0.235294	1	0.2733	2	0.3723	2	0.46
Zimai12	0.952381	4	0.857143	4	0.238095	1	1	4	0.683	3	0.8732	4	0.83
Lainong8621	1	4	1	4	0.823529	4	1	4	1	4	1	4	1
Qifeng2	0.210526	1	0.315789	2	0.315789	2	0.315789	2	0.315789	2	0.315789	2	0.46
Wenhang1	1	4	1	4	0.736842	3	1	4	0.9734	4	1	4	0.96
Wennong17	0.05	1	0.05	1	0.0555556	1	0.0555556	1	0.0462	1	0.0573	1	0.25
Bo8	0.809524	4	0.809524	4	0.809524	4	0.809524	4	0.809524	4	0.809524	4	1
Bonong6	0.222222	1	0.0625	1	0.0555556	1	0.0588235	1	0.0555556	1	0.0588235	1	0.25
Liangxing99	0.0454545	1	0.0526316	1	0.0526316	1	0.666667	3	0.6483	3	0.6328	3	0.5
Xinmai18	0.909091	4	1	4	0.5	3	1	4	1	4	1	4	0.96
Ningmaizi22	0.0555556	1	0.0625	1	0.0555556	1	0.0555556	1	0.0625	1	0.0625	1	0.25
Ningmaizi28	0.6	3	0.666667	3	0.733333	3	0.8	4	0.866667	4	0.782	4	0.88
Hemai13	1	4	0.733333	3	0.714286	3	0.7832	4	0.8263	4	0.9372	4	0.92
Hemai17	1	4	1	4	1	4	1	4	1	4	1	4	1
He9946	0.578947	3	1	4	1	4	0.625	3	0.7843	4	0.8933	4	0.92
Laizhou9361	0.6875	3	1	4	0.7833	4	0.6483	3	0.8346	4	0.6434	3	0.88
Lin4	0.318182	2	0.318182	2	0.318182	2	0.318182	2	0.318182	2	0.318182	2	0.5
Linmai2	1	4	1	4	1	4	1	4	1	4	1	4	1
Lianmai2	0.6875	3	0.578947	3	0.5	3	0.277778	2	0.4363	2	0.3782	2	0.63
Kenong199	0.789474	4	1	4	1	4	0.473684	2	0.7348	3	0.5789	3	0.83
Kenong2009	0.842105	4	0.333333	2	1	4	0.8932	4	0.7934	4	0.8934	4	0.92
Kenong3106	1	4	0.947368	4	0.894737	4	0.842105	4	0.789474	4	0.9823	4	1
Zhongyu01089	0.809524	4	0.809524	4	0.809524	4	0.809524	4	0.809524	4	0.809524	4	1
Zhongyu01095	1	4	0.571429	3	0.947368	4	0.6282	3	0.5722	3	0.7326	3	0.88
Jinghe91-P39	1	4	1	4	1	4	1	4	1	4	1	4	1
Wan38	1	4	1	4	1	4	1	4	1	4	1	4	1
Wan50	1	4	1	4	1	4	1	4	1	4	1	4	1
Wanmai52	1	4	1	4	1	4	1	4	1	4	1	4	1
Wanmai53	0.736842	3	0.684211	3	0.5437	3	0.4739	2	0.6832	3	0.4793	2	0.67
Fu84111	1	4	1	4	1	4	1	4	1	4	1	4	1
ShiB07-4056	0.4375	2	1	4	0.4375	2	0.6483	3	0.4793	2	0.7981	4	0.71
Shi08-534	0.647059	3	1	4	0.7349	3	0.8943	4	1	4	1	4	0.92
Han5092	0.05	1	0.0526316	1	0.0714286	1	0.0454545	1	0.0555556	1	0.0372	1	0.25
Han05-093	0.0526316	1	0.0625	1	0.0625	1	0.0555556	1	0.0588235	1	0.0837	1	0.25
Heng5229	0.0555556	1	0.0588235	1	0.0714286	1	0.0625	1	0.0588235	1	0.0555556	1	0.25
Heng5364	0.0555556	1	0.0588235	1	1	4	0.0588235	1	0.0526316	1	0.0588235	1	0.38
Heng4371	0.8	4	0.8	4	0.8	4	0.8	4	0.8	4	0.8	4	1
Hengguan76	1	4	1	4	1	4	1	4	1	4	1	4	1
Hengguan35	0.833333	4	0.823529	4	0.9	4	0.8473	4	0.9473	4	0.7493	3	0.96
He0927	0.888889	4	1	4	1	4	1	4	1	4	1	4	1
Jifu85012	0.35	2	1	4	0.3892	2	0.2844	2	0.7832	4	0.4383	2	0.58
Xuzhou24	0.761905	4	1	4	0.7439	3	0.8932	4	0.6832	3	0.7424	3	0.88
Yumai34	1	4	1	4	1	4	1	4	1	4	1	4	1
Yunong416	0.166667	1	0.117647	1	0.3125	2	0.4791	2	0.3812	2	0.3273	2	0.42
Yunong949	1	4	0.882353	4	0.705882	3	0.764706	4	0.736842	3	1	4	0.92
Yu70-36	0.863636	4	0.761905	4	0.8943	4	0.7483	3	0.8743	4	0.7833	4	0.96
Zhengmai7698	1	4	1	4	1	4	1	4	1	4	1	4	1
Zhengmai0856	1	4	0.761905	4	1	4	1	4	1	4	1	4	1
Zhengzi8780-2-5	1	4	0.888889	4	0.777778	4	0.9853	4	0.5844	3	1	4	0.96
Zhoumai16	0.473684	2	1	4	0.7349	3	0.8433	4	0.6733	3	0.8933	4	0.83
Zhoumai22	0.75	4	1	4	0.888889	4	1	4	1	4	0.7874	4	0.92
Zhoumai24	1	4	1	4	1	4	1	4	1	4	1	4	1
Zhoumai26	1	4	0.85	4	0.857143	4	0.904762	4	0.7343	3	0.6842	3	0.02
Zhoumai18	1	4	0.235294	1	0.444444	2	1	4	1	4	0.7433	3	0.75
Luo86036	0.684211	3	0.684211	3	0.684211	3	0.684211	3	0.684211	3	0.684211	3	0.75
Luo88079	1	4	0.888889	4	1	4	0.962963	4	0.8934	4	0.962963	4	1
Xinong157	0.0555556	1	0.222222	1	0.8734	4	0.4638	2	0.2834	2	0.6382	3	0.54
Xinong979	0.285714	2	0.0526316	1	0.0526316	1	0.4793	2	0.3792	2	0.2733	2	0.42
Lian0809	0.8	4	0.8	4	0.8	4	0.8	4	0.8	4	0.8	4	1
Lian0756	0.684211	3	0.684211	3	0.684211	3	0.684211	3	0.684211	3	0.684211	3	0.75
Lianfeng85	0.0526316	1	0.0555556	1	0.0588235	1	0.0526316	1	0.0555556	1	0.0578	1	0.25
Fengyou04	0.411765	2	1	4	1	4	0.4638	2	0.6538	3	0.4638	2	0.71
62008	1	4	1	4	1	4	1	4	1	4	1	4	1
PH82-2	1	4	1	4	1	4	1	4	1	4	1	4	1
08-26	0.291667	2	0.26087	2	0.869565	4	0.217391	1	0.269231	2	0.4392	2	0.54
Ci-5	1	4	1	4	1	4	1	4	1	4	1	4	1
Huacheng3366	1	4	0.7	3	0.8943	4	0.7933	4	0.9733	4	0.8837	4	0.96
Xinmai296	1	4	1	4	0.3	2	1	4	0.9734	4	0.7833	4	0.92
Shannong33	0.888889	4	0.7	3	0.65	3	0.7433	3	0.7543	4	0.6854	3	0.83
Shiruan02	0.142857	1	0.0714286	1	0.2893	2	0.1837	1	0.3845	2	0.1083	1	0.33
Zhu0263-541	1	4	1	4	1	4	1	4	1	4	1	4	1
Fan7030	0.0555556	1	0.0588235	1	0.0526316	1	0.047619	1	0.0847	1	0.0483	1	0.25
Luo22	0.35	2	0.35	2	0.35	2	0.35	2	0.35	2	0.35	2	0.5
Wanjin97-28	0.823529	4	1	4	1	4	1	4	1	4	1	4	1
Dhquntinanyidong	0.722222	3	0.842105	4	0.736842	3	0.7384	3	0.8873	4	0.7938	4	0.88
Ningdong11	0.0666667	1	0.0588235	1	0.0738	1	0.0738	1	0.1803	1	0.2891	2	0.29
Xingmai11	1	4	1	4	1	4	1	4	1	4	1	4	1
Zhen8906	0.277778	2	0.277778	2	0.277778	2	0.277778	2	0.277778	2	0.277778	2	0.5
Wo85	0.0625	1	0.0714286	1	0.0625	1	0.0732	1	0.0347	1	0.0683	1	0.25
Lunzao3	1	4	1	4	1	4	1	4	1	4	1	4	1
Xiaoyan22	1	4	1	4	0.8	4	1	4	1	4	1	4	1
Aifeng3	1	4	1	4	1	4	1	4	1	4	1	4	1
Mengxian201	1	4	1	4	0.25	2	0.7439	3	0.8387	4	0.6832	3	0.83
Gaocheng8901	0	0	0.7392	3	0.6483	3	0.3684	2	0.6342	3	0.6432	3	0.58
Xizhi8222-2-82	1	4	1	4	1	4	1	4	1	4	1	4	1
Yuejin5	1	4	1	4	1	4	1	4	1	4	0.625	4	1
Bima6	1	4	0.235294	1	0.7834	4	0.6822	3	0.572	3	0.8643	4	0.79
Aikang58	0.5	3	1	4	0.736842	3	1	4	0.7438	3	0.6743	3	0.83
Zhenmai18	0.888889	4	0.315789	2	0.7438	3	0.6382	3	0.4574	2	0.7328	3	0.71
Fanmai5	0.315789	2	0.421053	2	0.222222	1	0.3792	2	0.3283	2	0.2739	2	0.46
Fa0356	1	4	1	4	0.833333	4	0.8293	4	0.25	2	1	4	0.92
Huapei3	0.789474	4	0.444444	2	0.368421	2	0.7434	3	0.5732	3	0.6483	3	0.71
Yumai57	0.85	4	1	4	0.555556	3	0.578947	3	0.5	3	0.6483	3	0.83
Ke11
Ke15	0.666667	3	1	4	0.277778	2	0.352941	2	0.684211	3	0.6578	3	0.71
Ke16	0.3	2	0.3	2	0.3	2	0.3	2	0.3	2	0.3	2	0.5
Ke23	0.1	1	0.0526316	1	0.4687	2	0.6543	3	0.4688	2	0.5644	3	0.5
Ke27	1	4	0.6	3	0.8665	4	0.8675	4	0.5777	3	0.7564	4	0.92
Sheng32	1	4	0.529412	3	0.6755	3	0.7554	4	0.5678	3	0.8657	4	0.88
Sheng33	0.333333	2	0.2	1	0.263158	2	0.833333	4	0.75	4	0.4739	2	0.63
Sheng37	0.4	2	0.142857	1	0.3823	2	0.7434	3	0.2178	1	0.3672	2	0.46
Sheng39	0.0454545	1	0.047619	1	0.05	1	0.181818	1	0.1839	1	0.0832	1	0.25
Sheng43	0.9	4	0.894737	4	0.9377	4	0.8346	4	0.7832	4	1	4	1
Sheng46	1	4	1	4	1	4	1	4	1	4	1	4	1
Sheng57	0.727273	3	0.727273	3	0.727273	3	0.727273	3	0.727273	3	0.727273	3	0.75
Sheng58	1	4	1	4	1	4	1	4	1	4	1	4	1
Sheng59	0.875	4	0.3125	2	0.8743	4	0.7438	3	0.7874	4	0.8363	4	0.88
Sheng62	0.578947	3	1	4	0.6483	3	0.9832	4	0.6283	3	0.7823	4	0.88
Sheng68	1	4	0.117647	1	0.9	4	0.5768	3	0.6448	3	0.8659	4	0.79
Sheng70	0.909091	4	1	4	1	4	1	4	1	4	1	4	1
Sheng74	0.0555556	1	0.0555556	1	0.0555556	1	0.0454545	1	0.0457	1	0.0368	1	0.25
Sheng75	1	4	1	4	1	4	1	4	1	4	1	4	1
Sheng76	1	4	1	4	1	4	1	4	1	4	1	4	1
Sheng79	0.764706	4	0.777778	4	0.882353	4	0.7873	4	0.8633	4	0.8633	4	1
Sheng82	1	4	0.904762	4	1	4	0.583333	3	0.7293	3	0.8633	4	0.92
Sheng85	1	4	0.809524	4	0.8933	4	1	4	1	4	0.9733	4	1
Sheng86	0.0588235	1	0.0588235	1	0.0625	1	0.0625	1	0.0588235	1	0.0588235	1	0.25
Sheng87	1	4	0.777778	4	0.8364	4	0.9723	4	0.6282	3	1	4	0.96
Sheng88	0.85	4	0.85	4	0.85	4	0.85	4	0.85	4	0.85	4	1
Sheng90	1	4	1	4	0.818182	4	1	4	1	4	1	4	1
Sheng93	0.52381	3	0.52381	3	0.52381	3	0.52381	3	0.52381	3	0.52381	3	0.75
Sheng94	0.9	4	1	4	1	4	0.9731	4	0.7836	4	1	4	1
Sheng103	0.722222	3	0.666667	3	0.8643	4	0.5273	3	0.8362	4	0.6832	3	0.83
Sheng107	1	4	0.25	2	1	4	0.352941	2	0.277778	2	0.6473	3	0.71
Sheng115	1	4	1	4	1	4	1	4	1	4	1	4	1
Sheng116	0.833333	4	0.833333	4	0.833333	4	0.833333	4	0.833333	4	0.833333	4	1
Sheng119	1	4	1	4	1	4	1	4	1	4	1	4	1
Sheng125	0.05	1	0.0555556	1	0.05	1	0.05	1	0.105263	1	0.0736	1	0.25
Sheng126	1	4	0.263158	2	1	4	1	4	1	4	1	4	0.92
Sheng131	0.727273	3	0.952381	4	0.818182	4	0.8643	4	0.7393	3	0.9733	4	0.92
Sheng135	0.0454545	1	0.047619	1	0.047619	1	0.0454545	1	0.181818	1	0.0973	1	0.25
Sheng140	0.833333	4	0.833333	4	0.833333	4	0.833333	4	0.833333	4	0.833333	4	1
Sheng141	1	4	1	4	1	4	1	4	1	4	1	4	1
Sheng142	0.823529	4	0.823529	4	0.823529	4	0.823529	4	0.823529	4	0.823529	4	1
Sheng147	0.45	2	0.85	4	0.0555556	1	0.0638	1	0.0632	1	0.0927	1	0.29
Sheng148	0.0555556	1	0.0588235	1	0.0555556	1	0.0736	1	0.0368	1	0.0533	1	0.25
Sheng154	0.0588235	1	0.0625	1	0.0632	1	0.0457	1	0.0783	1	0.0263	1	0.25
Sheng157	0.0714286	1	0.0666667	1	0.0588235	1	0.0638	1	0.0726	1	0.0632	1	0.25
Sheng160	1	4	1	4	1	4	1	4	1	4	1	4	1
Sheng171	1	4	1	4	0.625	3	1	4	0.7476	3	0.8633	4	0.96
Sheng172	0.315789	2	0.941176	4	0.6384	3	0.8734	4	0.9734	4	1	4	0.88
Sheng174	0.0454545	1	0.047619	1	0.05	1	0.0624	1	0.0271	1	0.0648	1	0.25
Sheng183	0.272727	2	0.0588235	1	0.0588235	1	0.2611	2	0.0372	1	0.0683	1	0.33
Sheng194	0.0454545	1	0.0416667	1	0.3	2	0.1	2	0.130435	2	0.0454545	1	0.38
Sheng199	0.0555556	1	0.0588235	1	0.0620915	1	0.0653595	1	0.0686275	1	0.0718954	1	0.25
Sheng201	1	4	1	4	0.388889	2	0.6222	3	0.6342	3	0.5722	3	0.79
Sheng204	0.222222	1	0.235294	1	0.248366	1	0.261438	2	0.27451	2	0.287582	2	0.38
Sheng206	0.277778	2	0.111111	1	0.111111	1	0.2363	1	0.1383	1	0.2443	1	0.29
Sheng207	0.0625	1	0.0588235	1	0.05	1	0.0588235	1	0.0637	1	0.0673	1	0.25
Sheng213	0.684211	3	0.125	1	0.1875	1	0.133333	1	0.6523	3	0.1823	1	0.41
Sheng217	1	4	0.5	3	0.7522	4	0.8638	4	0.6564	3	0.5373	3	0.88
Sheng219	0.05	1	0.0526316	1	0.0555556	1	0.05437	1	0.0863	1	0.0321	1	0.25
Sheng231	1	4	0.4	2	1	4	1	4	1	4	0.6722	3	0.88
Sheng232	0.0625	1	0.0588235	1	0.0625	1	0.0555556	1	0.0588235	1	0.0555556	1	0.25
Sheng284	0.05	1	0.0526316	1	0.05	1	0.05	1	0.05	1	0.05	1	0.25
D209	0.0526316	1	0.05	1	0.0526316	1	0.0588235	1	0.176471	1	0.0864	1	0.25
D131	1	4	1	4	1	4	1	4	1	4	1	4	1
D180	1	4	1	4	1	4	1	4	1	4	1	4	1
D45	0.714286	3	0.85	4	1	4	0.8634	4	0.6782	3	0.9732	4	0.92
Hemai0302	0.0526316	1	0.0526316	1	0.0526316	1	0.0526316	1	0.0526316	1	0.0526316	1	0.25
Shi4185	0.454545	2	0.818182	4	0.105263	1	0.130435	1	0.6733	3	0.5739	3	0.58
W120134	1	4	1	4	1	4	1	4	1	4	1	4	1
W120283	0.809524	4	0.882353	4	0.882353	4	0.882353	4	0.882353	4	0.882353	4	1
W11031	0.761905	4	1	4	0.8784	4	0.7353	3	0.9732	4	1	4	0.96
W110095	0.421053	2	0.421053	2	0.421053	2	0.421053	2	0.421053	2	0.421053	2	0.5
W110149	0.0526316	1	0.0555556	1	0.25	2	0.333333	2	0.1273	1	0.0856	1	0.33
9903322	0.047619	1	0.0526316	1	0.0526316	1	0.0526316	1	0.789474	4	0.4	2	0.42
W110143	0.0454545	1	0.0526316	1	0.0526316	1	0.047619	1	0.0682	1	0.0244	1	0.25
W110144	1	4	1	4	1	4	1	4	1	4	1	4	1
W110163	0.375	2	0.375	2	0.375	2	0.375	2	0.375	2	0.375	2	0.5

## Sheet: 2016 greenhouse
2016 greenhouse diseased spikelet rate
Varieties	disease spikelet rate	Disease index	repeat 2		repeat 3		repeat 4		repeat 5		repeat 6		Disease index
Zhaoshan15	0.25	2	0.444444	2	0.45	2	0.5	3	0.4732	2	0.3874	2	0.54
Shannong17	0.8125	4	0.722222	3	1	4	0.733333	3	1	4	0.8642	4	0.92
Shannong19	0.6563	3	1	4	0.7863	4	0.8632	4	0.7943	4	0.8474	4	0.96
Shannong20	0.764706	4	0.722222	3	1	4	0.882353	4	0.823529	4	0.944444	4	1
Shannong10-2	0.833333	4	0.941176	4	0.764706	4	0.722222	3	0.944444	4	0.8421	4	0.96
Shannong11	0.5	3	0.222222	1	0.125	1	0.25	2	0.388889	2	0.3137	2	0.46
Shannong12	0.1383	1	0.208333	1	0.0782	1	0.1783	1	0.3281	2	0.2342	1	0.29
Shannong06-278	1	4	1	4	0.928571	4	0.8125	4	0.9532	4	1	4	1
Shannongyoumai3	0.888889	4	1	4	1	4	1	4	0.9737	4	1	4	1
Shannong0919	0.916667	4	0.642857	3	0.785714	4	0.5	3	0.8723	4	0.6432	3	0.75
Shannong55843	0.388889	2	0.333333	2	0.4	2	0.3125	2	0.2733	2	0.4621	2	0.5
Shannong22	0.6	3	0.909091	4	0.722222	3	0.888889	4	0.8632	4	0.7027	3	0.75
Shannong23	0.333333	2	0.777778	4	0.5262	3	0.2763	2	0.7531	4	0.5212	3	0.75
Shannong005849	0.888889	4	0.95	4	0.9732	4	0.8632	4	0.7823	4	0.8632	4	1
Xinshannong11	0.5	3	0.75	4	0.6322	3	0.6832	3	0.5833	3	0.6682	3	0.79
Taishan21	1	4	1	4	1	4	1	4	1	4	0.6	3	0.96
Tainong18	0.8125	4	0.642857	3	0.3125	2	0.4793	2	0.6523	3	0.5432	3	0.71
Tainong9236	0.95	4	0.9	4	0.9375	4	0.958333	4	0.95	4	0.888889	4	1
Tainong19	0.928571	4	0.857143	4	0.928571	4	0.75	4	0.5625	3	0.8632	4	0.96
Lumai14	0.6875	3	0.625	3	1	4	1	4	0.5732	3	0.7532	4	0.88
Lumai23	1	4	0.9375	4	0.888889	4	0.875	4	0.7821	4	1	4	1
Luyuan502	0.8125	4	0.6875	3	0.8263	4	0.6822	3	0.7832	4	0.7322	3	0.88
Luyuan205	0.5625	3	0.5625	3	0.5732	3	0.5723	3	0.5216	3	0.4927	2	0.71
Jining16	0.666667	3	0.545455	3	0.5011	3	0.6368	3	0.5723	3	0.7523	4	0.79
Jining6058	1	4	0.875	4	0.6875	3	0.8623	4	0.682	3	1	4	0.92
Jimai19	0.7	3	0.7	3	0.7	3	0.7	3	0.7	3	0.7	3	0.75
Jimai21	0.8125	4	0.625	3	0.6875	3	0.7643	4	0.7832	4	0.6322	3	0.88
Jimai22	0.666667	3	0.722222	3	0.6	3	0.65793	3	0.7253	3	0.7362	3	0.75
Jinan17	1	4	1	4	0.8125	4	1	4	0.7921	4	1	4	1
Yannong21	1	4	0.4375	2	0.7436	3	0.9732	4	0.5683	3	0.7763	4	0.83
Yannong19	0.777778	4	1	4	0.9732	4	0.6327	3	0.8732	4	0.9722	4	0.96
Yannong999	1	4	1	4	1	4	1	4	1	4	1	4	1
Yan99102	0.9	4	0.888889	4	0.9375	4	0.888889	4	0.888889	4	0.8332	4	1
Weiyin84173	0.3682	2	0.3728	2	0.2783	2	0.47822	2	0.3292	2	0.4822	2	0.5
Wei60182	0.785714	4	0.785714	4	0.785714	4	0.785714	4	0.785714	4	0.785714	4	1
Weimai8	1	4	1	4	1	4	1	4	1	4	1	4	1
Zimai12	1	4	0.833333	4	0.777778	4	0.8634	4	0.6342	3	1	4	0.96
Lainong8621	0.5625	3	0.65	3	0.333333	2	0.7632	4	0.4832	2	0.5732	3	0.71
Qifeng2	0.388889	2	0.166667	1	0.125	1	0.2286	1	0.2368	1	0.1633	1	0.29
Wenhang1	1	4	1	4	0.875	4	0.9375	4	1	4	0.8743	4	1
Wennong17	0.166667	1	0.1875	1	0.0714286	1	0.2199	1	0.0732	1	0.1628	1	0.25
Bo8	0.9375	4	0.833333	4	0.777778	4	1	4	0.8623	4	0.7633	4	1
Bonong6	1	4	1	4	1	4	1	4	1	4	1	4	1
Liangxing99	0.888889	4	0.571429	3	0.7352	3	0.7643	4	0.8643	4	0.6832	3	0.88
Xinmai18	0.555556	3	1	4	1	4	0.7643	4	0.8632	4	0.5722	3	0.92
Ningmaizi22	0.875	4	0.888889	4	1	4	1	4	1	4	0.9732	4	1
Ningmaizi28	0.54373	3	0.3564	2	0.4793	2	0.4633	2	0.26732	2	0.3572	2	0.54
Hemai13	1	4	1	4	1	4	1	4	1	4	1	4	1
Hemai17	1	4	1	4	1	4	1	4	1	4	1	4	1
He9946	0.944444	4	1	4	0.944444	4	1	4	0.611111	3	0.8363	4	1
Laizhou9361	1	4	0.833333	4	0.95	4	0.545455	3	0.7383	3	0.8632	4	0.92
Lin4	1	4	0.9375	4	0.5	3	0.8643	4	0.7493	3	0.8743	4	0.92
Linmai2	1	4	1	4	1	4	1	4	1	4	1	4	1
Lianmai2	0.777778	4	0.722222	3	0.8	4	0.777778	4	0.6875	3	0.714286	3	0.88
Kenong199	0.666667	3	0.625	3	0.722222	3	0.722222	3	0.6875	3	0.666667	3	0.75
Kenong2009	1	4	1	4	1	4	1	4	1	4	1	4	1
Kenong3106	1	4	1	4	0.5	3	0.8362	4	0.6383	3	0.8363	4	0.92
Zhongyu01089	0.4	2	0.454545	2	0.25	2	0.4833	2	0.3684	2	0.4792	2	0.75
Zhongyu01095	0.5625	3	0.5625	3	0.5625	3	0.5625	3	0.5625	3	0.5625	3	0.75
Jinghe91-P39	0.8	4	1	4	1	4	1	4	0.555556	3	0.8633	4	0.96
Wan38	0.6875	3	0.625	3	0.5625	3	0.555556	3	0.583	3	0.6372	3	0.75
Wan50	0.9	4	0.409091	2	0.611111	3	0.8623	4	0.7643	4	0.6832	4	0.88
Wanmai52	1	4	0.954545	4	0.9	4	1	4	1	4	1	4	1
Wanmai53	0.7	3	0.409091	2	0.888889	4	0.7483	3	0.6534	3	0.8633	4	0.79
Fu84111	1	4	1	4	1	4	0.777778	4	1	4	0.9733	4	1
ShiB07-4056	1	4	0.8125	4	0.833333	4	0.6433	3	1	4	0.8473	4	0.96
Shi08-534	0.9375	4	0.9375	4	0.9375	4	0.9375	4	0.9375	4	0.9375	4	1
Han5092	0.3784	2	0.3822	2	0.3729	2	0.2389	1	0.47822	2	0.3648	2	0.46
Han05-093	0.388889	2	0.277778	2	0.277778	2	0.3684	2	0.2083	1	0.3284	2	0.46
Heng5229	0.01782	1	0.01872	1	0.01728	1	0.1892	1	0.01829	1	0.2811	2	0.29
Heng5364	0.8125	4	0.555556	3	0.6834	3	0.7532	4	0.6832	3	0.5739	3	0.83
Heng4371	0.388889	2	0.1875	1	0.273	2	0.3792	2	0.4792	2	0.2344	1	0.24
Hengguan76	1	4	0.833333	4	0.888889	4	0.555556	3	0.7353	3	0.8364	4	0.92
Hengguan35	1	4	0.666667	3	0.3125	2	0.8634	4	0.6372	3	0.6383	3	0.88
He0927	1	4	0.3125	2	0.25	2	0.7833	4	0.6973	3	0.9372	4	0.79
Jifu85012	0.3732	2	0.37823	2	0.47922	2	0.18923	1	0.5261	3	0.3622	2	0.24
Xuzhou24	0.3125	2	0.166667	1	0.333333	2	0.25	2	0.3327	2	0.3737	2	0.46
Yumai34	0.375	2	0.25	2	0.166667	1	0.388889	2	0.2933	2	0.3744	2	0.46
Yunong416	1	4	1	4	1	4	1	4	1	4	1	4	1
Yunong949	0.9	4	0.9	4	0.9	4	0.9	4	0.9	4	0.9	4	1
Yu70-36	0.888889	4	0.888889	4	0.888889	4	0.888889	4	0.888889	4	0.888889	4	1
Zhengmai7698	0.9375	4	1	4	0.888889	4	0.428571	2	0.7362	3	0.8634	4	0.88
Zhengmai0856	0.833333	4	0.4	2	0.6382	3	0.8732	4	0.5732	3	0.6832	3	0.79
Zhengzi8780-2-5	1	4	1	4	0.5	3	0.8632	4	0.6832	3	0.8632	4	0.92
Zhoumai16	0.666667	3	0.714286	3	0.4375	2	0.5732	3	0.7362	3	0.6272	3	0.71
Zhoumai22	0.8	4	0.8	4	0.8	4	0.8	4	0.8	4	0.8	4	1
Zhoumai24	1	4	1	4	0.888889	4	0.8125	4	0.857143	4	0.833333	4	1
Zhoumai26	1	4	0.7	3	0.944444	4	1	4	0.8643	4	0.9742	4	0.96
Zhoumai18	1	4	1	4	0.875	4	0.95	4	0.9734	4	1	4	1
Luo86036	0.666667	3	0.666667	3	0.666667	3	0.666667	3	0.666667	3	0.666667	3	0.75
Luo88079	0.75	4	1	4	0.95	4	1	4	1	4	1	4	1
Xinong157	1	4	1	4	1	4	1	4	1	4	1	4	1
Xinong979	1	4	0.882353	4	0.666667	3	0.9742	4	0.76483	4	1	4	0.96
Lian0809	0.3	2	0.777778	4	0.3125	2	0.555556	3	0.4722	2	0.8632	4	0.71
Lian0756	0.555556	3	0.555556	3	0.555556	3	0.555556	3	0.555556	3	0.555556	3	0.75
Lianfeng85	1	4	0.555556	3	0.6432	3	0.9732	4	0.8632	4	0.7493	3	0.83
Fengyou04	1	4	0.444444	2	0.388889	2	0.7833	4	0.8392	4	0.9743	4	0.83
62008	1	4	0.75	4	1	4	0.0454545	1	0.6483	3	0.7382	3	0.79
PH82-2	1	4	0.95	4	1	4	1	4	1	4	1	4	1
08-26	0.681818	3	0.681818	3	0.727273	3	0.95	4	0.7932	4	0.8642	4	0.75
Ci-5	0.75	4	1	4	1	4	1	4	0.9723	4	0.8634	4	1
Huacheng3366	0.25	2	0.05	1	0	0	0	0	0	0	0.1739	1	0.17
Xinmai296	1	4	0.6	3	0.944444	4	1	4	0.8342	4	1	4	0.96
Shannong33	1	4	0.714286	3	0.4375	2	0.5	3	0.944444	4	0.8432	4	0.83
Shiruan02	1	4	1	4	1	4	0.777778	4	0.9732	4	1	4	1
Zhu0263-541	0.333333	2	0.409091	2	0.35	2	0.4739	2	0.3893	2	0.4793	2	0.75
Fan7030	0.4792	2	0.3628	2	0.6271	3	0.5721	3	0.6232	3	0.37382	2	0.63
Luo22	0.833333	4	0.65	3	0.9	4	1	4	0.7382	3	0.9722	4	0.92
Wanjin97-28	1	4	1	4	0.7	3	0.7932	4	1	4	1	4	0.96
Dhquntinanyidong	0.1875	1	0.357143	2	0.166667	1	0.3125	2	0.277778	2	0.1738	1	0.38
Ningdong11	0.625	3	0.954545	4	0.555556	3	0.727273	3	0.388889	2	0.65	3	0.75
Xingmai11	0.833333	4	0.636364	3	0.909091	4	0.7932	4	0.9732	4	0.6822	3	0.92
Zhen8906	0.333333	2	0.3125	2	0.3292	2	0.3794	2	0.3792	2	0.4022	2	0.75
Wo85	0.785714	4	0.714286	3	0.857143	4	0.9375	4	0.944444	4	1	4	0.96
Lunzao3	1	4	0.772727	4	1	4	1	4	1	4	0.9724	4	1
Xiaoyan22	1	4	0.928571	4	0.875	4	0.8634	4	0.7372	3	0.8682	4	0.96
Aifeng3	1	4	0.722222	3	0.928571	4	0.7923	4	0.9722	4	1	4	0.96
Mengxian201	1	4	1	4	1	4	1	4	1	4	1	4	1
Gaocheng8901	1	4	1	4	0.785714	4	0.8723	4	0.8732	4	0.9723	4	1
Xizhi8222-2-82	1	4	1	4	1	4	1	4	1	4	1	4	1
Yuejin5	1	4	1	4	0.833333	4	1	4	1	4	1	4	1
Bima6	1	4	1	4	1	4	1	4	1	4	1	4	1
Aikang58	1	4	1	4	0.9375	4	0.714286	3	0.8622	4	0.8373	4	0.96
Zhenmai18	1	4	1	4	1	4	1	4	1	4	1	4	1
Fanmai5	1	4	1	4	1	4	0.642857	3	1	4	0.7329	3	0.92
Fa0356	0.3792	2	0.4792	2	0.4682	2	0.6282	3	0.46822	2	0.3648	2	0.54
Huapei3	0.714286	3	0.888889	4	0.416667	2	0.388889	2	0.6823	3	0.6832	3	0.71
Yumai57	1	4	1	4	0.9375	4	0.875	4	1	4	1	4	1
Ke11	0.5	3	1	4	0.9375	4	1	4	0.625	3	0.7927	4	0.92
Ke15	1	4	1	4	1	4	1	4	1	4	1	4	1
Ke16	0.357143	2	0.214286	1	0.3125	2	0.5	3	0.333333	2	0.3794	2	0.5
Ke23	1	4	0.888889	4	1	4	0.7932	4	0.9832	4	0.8632	4	1
Ke27	1	4	1	4	1	4	1	4	1	4	1	4	1
Sheng32	0.9375	4	0.9375	4	0.9375	4	0.9375	4	0.9375	4	0.9375	4	1
Sheng33	1	4	1	4	1	4	1	4	1	4	1	4	1
Sheng37	0.944444	4	0.944444	4	0.944444	4	0.944444	4	0.944444	4	0.944444	4	1
Sheng39	0.777778	4	0.9	4	0.5	3	0.7922	4	0.8273	4	0.7329	3	0.92
Sheng43	1	4	0.666667	3	0.8	4	0.45	2	0.7922	4	0.9723	4	0.88
Sheng46	0.785714	4	0.857143	4	0.833333	4	0.8632	4	0.7821	4	0.7222	3	0.96
Sheng57	0.6875	3	1	4	0.7822	4	0.8623	4	0.6823	3	0.7823	4	0.92
Sheng58	1	4	1	4	1	4	0.9375	4	1	4	1	4	1
Sheng59	1	4	1	4	1	4	1	4	1	4	1	4	1
Sheng62	0	0	0.166667	1	0.125	1	0.1972	1	0.0992	1	0.1928	1	0.21
Sheng68	1	4	1	4	0.916667	4	0.857143	4	1	4	1	4	1
Sheng70	0.875	4	1	4	0.5	3	1	4	0.7292	3	1	4	0.96
Sheng74	1	4	1	4	0.777778	4	1	4	0.7922	4	1	4	1
Sheng75	1	4	0.95	4	1	4	1	4	1	4	1	4	1
Sheng76	1	4	0.944444	4	1	4	1	4	1	4	1	4	1
Sheng79	1	4	0.5	3	1	4	1	4	0.5832	3	0.4083	2	0.83
Sheng82	1	4	0.4375	2	0.333333	2	0.555556	3	0.7773	4	0.6823	3	0.75
Sheng85	1	4	1	4	1	4	1	4	1	4	1	4	1
Sheng86	0.85	4	0.85	4	0.85	4	0.85	4	0.85	4	0.85	4	1
Sheng87	1	4	0.5625	3	1	4	0.5272	3	1	4	0.8623	4	0.92
Sheng88	0.833333	4	1	4	0.4375	2	0.7323	3	0.8262	4	0.6832	3	0.83
Sheng90	0.833333	4	0.75	4	0.8623	4	0.8632	4	0.7352	3	0.7372	3	0.92
Sheng93	1	4	0.9375	4	1	4	0.777778	3	0.8723	4	0.8327	4	0.96
Sheng94	0.5	3	0.285714	2	0.3484	2	0.4792	2	0.5793	3	0.4832	2	0.58
Sheng103	1	4	1	4	1	4	1	4	1	4	1	4	1
Sheng107	1	4	1	4	1	4	1	4	1	4	1	4	1
Sheng115	0.8125	4	0.8125	4	0.8125	4	0.8125	4	0.8125	4	0.8125	4	1
Sheng116	1	4	0.833333	4	0.5	3	0.55	3	0.95	4	0.8623	4	0.92
Sheng119	1	4	0.3125	2	0.4793	2	0.8623	4	0.7532	4	0.8633	4	0.83
Sheng125	0.928571	4	0.375	2	0.7393	3	0.8633	4	0.5033	3	0.7593	4	0.83
Sheng126	1	4	1	4	0.888889	4	0.9375	4	1	4	0.722222	3	0.96
Sheng131	1	4	1	4	0.666667	3	0.6834	3	1	4	1	4	0.92
Sheng135	0.75	4	0.75	4	0.75	4	0.75	4	0.75	4	0.75	4	1
Sheng140	0.76322	4	0.72283	3	0.8262	4	0.8362	4	0.7342	3	0.6832	3	0.88
Sheng141	0.785714	4	0.583333	3	0.642857	3	0.6384	3	0.77623	4	0.5433	3	0.83
Sheng142	0.928571	4	0.916667	4	1	4	1	4	1	4	1	4	1
Sheng147	0.73532	3	0.5732	3	0.6732	3	0.72532	3	0.863	4	0.5327	3	0.79
Sheng148	1	4	0.928571	4	1	4	1	4	1	4	1	4	1
Sheng154	0.714286	3	0.75	4	0.785714	4	0.821429	4	0.857143	4	0.6832	3	0.92
Sheng157	1	4	0.5	3	0.785714	4	0.642857	3	0.8632	4	0.7322	3	0.88
Sheng160	1	4	1	4	1	4	1	4	1	4	1	4	1
Sheng171	1	4	0.6875	3	0.625	3	0.862	4	0.7932	4	0.9732	4	0.92
Sheng172	0.5	3	0.3125	2	0.214286	1	0.1875	1	0	0	0	0	0.29
Sheng174	1	4	1	4	0.888889	4	1	4	1	4	1	4	1
Sheng183	0.8125	4	0.8125	4	0.863636	4	0.8634	4	0.7833	4	0.8632	4	1
Sheng194	0.818182	4	0.333333	2	0.35	2	0.727273	3	0.916667	4	0.6834	3	0.75
Sheng199	0.625	3	0.6875	3	0.642857	3	1	4	0.6834	3	1	4	0.83
Sheng201	1	4	1	4	1	4	1	4	1	4	0.9375	4	1
Sheng204	0.333333	2	0	0	0.357143	2	0.428571	2	0.1875	1	0.388889	2	0.38
Sheng206	1	4	0.833333	4	1	4	1	4	1	4	1	4	1
Sheng207	0	0	0.0555556	1	0	0	0	0	0	0	0.0742	1	0.08
Sheng213	0.285714	2	0.0714286	1	0.125	1	0	0	0.1875	1	0.0927	1	0.25
Sheng217	1	4	0.714286	3	1	4	0.6322	3	1	4	1	4	0.92
Sheng219	0.428571	2	1	4	0.933333	4	0.8	4	0.555556	3	0.6832	3	0.75
Sheng231	0.45	2	1	4	0.8623	4	0.7763	4	0.7232	3	0.6823	3	0.75
Sheng232	0.6875	3	0.5	3	0.277778	2	0.5733	3	0.6832	3	0.7667	4	0.75
Sheng284	1	4	0.5	3	0.3125	2	0.7238	3	0.8632	4	0.6832	3	0.79
D209	1	4	0.944444	4	1	4	1	4	1	4	1	4	1
D131	1	4	1	4	1	4	1	4	1	4	1	4	1
D180	0.5	3	1	4	1	4	1	4	1	4	0.7897	4	1
D45	1	4	0.3125	2	0.8346	4	0.7843	4	0.8643	4	0.7934	4	0.92
Hemai0302	1	4	0.8125	4	1	4	1	4	0.8632	4	1	4	1
Shi4185	0.954545	4	0.954545	4	0.954545	4	0.954545	4	0.954545	4	0.954545	4	1
W120134	1	4	1	4	1	4	0.785714	4	0.8932	4	1	4	1
W120283	0.611111	3	0.5625	3	1	4	1	4	0.6837	3	0.5322	3	0.83
W11031	0.9375	4	0.888889	4	1	4	0.85	4	0.875	4	1	4	1
W110095	0.6237	3	0.432872	2	0.46382	2	0.46832	2	0.6328	3	0.63282	3	0.63
W110149	0.25	2	0.277778	2	0.111111	1	0.1972	1	0.28933	2	0.2012	1	0.38
9903322	0	0	0.0555556	1	0.0555556	1	0.0555556	1	0.1875	1	0.166667	1	0.21
W110143	0.388889	2	0.888889	4	0.333333	2	0.388889	2	1	4	0.6822	3	0.71
W110144	1	4	0.944444	4	1	4	1	4	1	4	1	4	1
W110163	1	4	0.785714	4	0.7932	4	1	4	0.6732	3	1	4	0.96

## Sheet: Disease index
	2017greenhouse			2017the experimental field			2016the experimental field
Varieties	Disease index	Disease spikelet rate	FHB resistance	Disease index	Disease spikelet rate	FHB resistance	Disease index	Disease spikelet rate	FHB resistance
Zhaoshan15	1	0.5952	S	1	1	S	0.54	0.411111	MS
Shannong17	0.875	0.9279	S	1	0.75	S	0.92	0.853611	S
Shannong19	0.96	0.8529	S	0.96	0.9176	S	0.96	0	S
Shannong20	1	0.8296	S	0.96	0.9706	S	1	0.856209	S
Shannong10-2	1	0.8834	S	0.96	1	S	0.96	0.841176	S
Shannong11	0.25	0.0962	MR	0.25	0.7589	MR	0.36	0.297222	MR
Shannong12	0.29	0.1961	MR	0.38	0.3697	MR	0.29	0	MR
Shannong06-278	1	0.9286	S	0.96	1	S	1	0.935268	S
Shannongyoumai3	1	0.85	S	1	1	S	1	0.972222	S
Shannong0919	1	0.7964	S	0.92	0.9259	S	0.75	0.71131	S
Shannong55843	1	0.8182	S	1	1	S	0.5	0.358681	MS
Shannong22	0.63	0.9211	MS	0.88	0.6873	S	0.75	0.780051	S
Shannong23	0.42	0.2381	MS	0.33	0.0611	MR	0.75	0.555556	S
Shannong005849	1	0.8684	S	0.96	0.7794	S	1	0.919444	S
Xinshannong11	1	0.4613	S	0.67	0.7914	S	0.79	0.625	S
Taishan21	0.17	0.0556	MR	0.25	0.0667	MR	0.96	0.933333	S
Tainong18	0.96	1	S	1	0.8015	S	0.71	0.589286	S
Tainong9236	1	0.8636	S	1	1	S	1	0.930787	S
Tainong19	0.96	0.2323	S	0.5	0.8485	MS	0.96	0.805357	S
Lumai14	1	0.7778	S	1	1	S	0.88	0.770833	S
Lumai23	1	0.9365	S	1	1	S	1	0.925347	S
Luyuan502	0.58	0.5211	MS	0.67	0.6404	MS	0.88	0.75	S
Luyuan205	0.33	0.3333	MR	0.5	0.3892	MS	0.71	0.5625	S
Jining16	0.21	0.0483	MR	0.25	1	MR	0.79	0.606061	S
Jining6058	0.58	0.9048	MS	1	0.9074	S	0.92	0.854167	S
Jimai19	1	0.9011	S	0.92	1	S	0.75	0.7	S
Jimai21	1	0.3145	S	0.58	1	MS	0.88	0.708333	S
Jimai22	1	0.9605	S	1	1	S	0.75	0.662963	S
Jinan17	0.75	0.85	S	0.92	0.8235	S	1	0.953125	S
Yannong21	1	0.4474	S	0.58	0.963	MS	0.83	0.71875	S
Yannong19	1	0.6842	S	0.83	0.7353	S	0.96	0.888889	S
Yannong999	1	0.6487	S	0.83	0.9208	S	1	1	S
Yan99102	0.96	0.7524	S	0.88	0.8461	S	1	0.900833	S
Weiyin84173	0.38	0.6529	MR	0.58	0.1544	MS	0.5	0	MS
Wei60182	1	1	S	1	1	S	1	0.785714	S
Weimai8	0.63	0.3165	MS	0.46	0.2763	MS	1	1	S
Zimai12	1	0.7619	S	0.83	1	S	0.96	0.87037	S
Lainong8621	0.63	0.9706	MS	1	0.4965	S	0.71	0.515278	S
Qifeng2	0.45	0.2632	MS	0.46	0.375	MS	0.29	0.226852	MR
Wenhang1	1	0.9123	S	0.96	0.7353	S	1	0.953125	S
Wennong17	0.25	0.0528	MR	0.25	0.0576	MR	0.25	0.141865	MR
Bo8	0.58	0.8095	MS	1	0.7344	S	1	0.887153	S
Bonong6	1	0.0856	S	0.25	0.7707	MR	1	1	S
Liangxing99	1	0.2043	S	0.5	0.6007	MS	0.88	0.730159	S
Xinmai18	1	0.803	S	0.96	1	S	0.92	0.851852	S
Ningmaizi22	0.69	0.7327	MS	0.64	0.85	MS	0.69	0.952778	S
Ningmaizi28	0.43	0.6333	MS	0.45	0.1112	MS	0.54	0.0166667	MS
Hemai13	1	0.8159	S	0.92	1	S	1	1	S
Hemai17	0.54	1	MS	1	0.4667	S	1	1	S
He9946	0.88	0.801	S	0.92	0.8237	S	1	0.9	S
Laizhou9361	1	0.8438	S	0.88	0.6111	S	0.92	0.832197	S
Lin4	0.25	0.3182	MR	0.5	0.1927	MS	0.92	0.8125	S
Linmai2	0.83	1	S	1	0.7917	S	1	1	S
Lianmai2	0.58	0.5111	MS	0.63	0.6476	MS	0.88	0.746594	S
Kenong199	0.88	0.8158	S	0.83	0.8074	S	0.75	0.681713	S
Kenong2009	1	0.7251	S	0.92	0.85	S	1	1	S
Kenong3106	1	0.9737	S	1	1	S	0.92	0.833333	S
Zhongyu01089	1	0.8095	S	1	1	S	0.75	0.368182	S
Zhongyu01095	0.88	0.8396	S	0.88	0.8529	S	0.75	0.5625	S
Jinghe91-P39	1	1	S	1	1	S	0.96	0.871111	S
Wan38	0.67	1	MS	1	0.6755	S	0.75	0.607639	S
Wan50	0.88	1	S	1	0.8971	S	0.88	0.640067	S
Wanmai52	0.75	1	S	1	0.7826	S	1	0.951515	S
Wanmai53	0.58	0.7105	MS	0.67	0.6527	MS	0.79	0.665993	S
Fu84111	1	1	S	1	0.9085	S	1	0.955556	S
ShiB07-4056	0.88	0.625	S	0.71	0.7895	S	0.96	0.881944	S
Shi08-534	1	0.8235	S	0.92	1	S	1	0.9375	S
Han5092	0.75	0.055	S	0.25	0.5425	MR	0.46	0	MS
Han05-093	0.75	0.0584	S	0.25	0.7941	MR	0.46	0.314815	MS
Heng5229	0.46	0.0604	MS	0.25	0.1979	MR	0.29	0	MR
Heng5364	1	0.2141	S	0.38	1	MR	0.83	0.684028	S
Heng4371	0.25	0.8	MR	1	0.0596	S	0.24	0.288194	MR
Hengguan76	0.79	1	S	1	0.5678	S	0.92	0.819444	S
Hengguan35	0.92	0.8523	S	0.96	0.8933	S	0.88	0.659722	S
He0927	0.92	0.9778	S	1	0.8538	S	0.79	0.520833	S
Jifu85012	0.33	0.675	MR	0.58	0.1329	MS	0.24	0	MR
Xuzhou24	0.71	0.881	S	0.88	0.4412	S	0.46	0.265625	MS
Yumai34	1	1	S	1	1	S	0.46	0.295139	MS
Yunong416	0.75	0.1989	S	0.42	0.6412	MS	1	1	S
Yunong949	1	0.818	S	0.92	0.9529	S	1	0.9	S
Yu70-36	1	0.8128	S	0.96	1	S	1	0.888889	S
Zhengmai7698	1	1	S	1	1	S	0.88	0.81374	S
Zhengmai0856	1	0.9524	S	1	1	S	0.79	0.616667	S
Zhengzi8780-2-5	1	0.9444	S	0.96	1	S	0.92	0.833333	S
Zhoumai16	1	0.7368	S	0.83	1	S	0.71	0.606151	S
Zhoumai22	1	0.9278	S	0.92	1	S	1	0.8	S
Zhoumai24	1	1	S	1	1	S	1	0.898644	S
Zhoumai26	0.63	0.903	MS	0.67	0.7222	MS	0.96	0.911111	S
Zhoumai18	0.96	0.5599	S	0.75	0.925	S	1	0.95625	S
Luo86036	0.79	0.6842	S	0.75	0.8246	S	0.75	0.666667	S
Luo88079	0.92	0.963	S	1	0.8667	S	1	0.94	S
Xinong157	1	0.9832	S	0.54	0.9844	MS	1	1	S
Xinong979	0.79	0.1303	S	0.42	0.7237	MS	0.96	0.849673	S
Lian0809	0.71	0.8	S	1	0.3935	S	0.71	0.486458	S
Lian0756	0.79	0.6842	S	0.75	0.7632	S	0.75	0.555556	S
Lianfeng85	1	0.055	S	0.25	1	MR	0.83	0.777778	S
Fengyou04	0.75	0.8039	S	0.71	0.7619	S	0.83	0.611111	S
62008	1	1	S	1	0.8158	S	0.79	0.698864	S
PH82-2	1	1	S	1	1	S	1	0.983333	S
08-26	0.36	0.3817	MR	0.54	0	MS	0.75	0.760227	S
Ci-5	1	1	S	1	0.0714	S	1	0.9375	S
Huacheng3366	1	0.85	S	0.96	1	S	0.17	0.06	MR
Xinmai296	1	0.825	S	0.92	1	S	0.96	0.886111	S
Shannong33	1	0.7463	S	0.83	0.8125	S	0.83	0.719246	S
Shiruan02	0.23	0.1071	MR	0.33	0.0714	MR	1	0.944444	S
Zhu0263-541	1	1	S	1	0.6765	S	0.75	0.364141	S
Fan7030	1	0.0537	S	0.25	0.825	MR	0.63	0	MS
Luo22	0.25	0.35	MR	0.5	0.6071	MS	0.92	0.845833	S
Wanjin97-28	1	0.9559	S	1	0.7143	S	0.96	0.9	S
Dhquntinanyidong	1	0.7671	S	0.88	0	S	0.38	0.260317	MS
Ningdong11	1	0.0627	S	0.29	1	MR	0.75	0.65021	S
Xingmai11	1	1	S	1	1	S	0.92	0.792929	S
Zhen8906	0.45	0.2778	MS	0.5	0.3892	MS	0.75	0.322917	S
Wo85	0.2	0.0655	MR	0.25	1	MR	0.96	0.873181	S
Lunzao3	0.92	1	S	1	0.8824	S	1	0.954545	S
Xiaoyan22	1	0.95	S	1	0.7778	S	0.96	0.934524	S
Aifeng3	0.83	1	S	1	0.7176	S	0.96	0.883598	S
Mengxian201	1	0.75	S	0.83	0.6667	S	1	1	S
Gaocheng8901				0.58	0.6732	MS	1	0.928571	S
Xizhi8222-2-82	1	1	S	1	1	S	1	1	S
Yuejin5	1	0.9375	S	1	1	S	1	0.972222	S
Bima6	0.78	0.6176	S	0.79	1	S	1	1	S
Aikang58	1	0.8092	S	0.83	1	S	0.96	0.912946	S
Zhenmai18	1	0.6023	S	0.71	1	S	1	1	S
Fanmai5	0.58	0.3197	MS	0.46	0.6199	MS	0.92	0.928571	S
Fa0356	1	0.8167	S	0.92	1	S	0.54	0	MS
Huapei3	1	0.5341	S	0.71	0.9706	S	0.71	0.602183	S
Yumai57	1	0.6969	S	0.83	1	S	1	0.96875	S
Ke11				1	1	S	0.92	0.8125	S
Ke15	0.88	0.5963	S	0.71	0.8556	S	1	1	S
Ke16	1	0.3	S	0.5	1	MS	0.5	0.343452	MS
Ke23	0.5	0.0763	MS	0.5	0.5103	MS	1	0.944444	S
Ke27	1	0.8	S	0.92	1	S	1	1	S
Sheng32	0.83	0.7647	S	0.88	0.741	S	1	0.9375	S
Sheng33	0.75	0.476	S	0.63	0.765	MS	1	1	S
Sheng37	0.75	0.2714	S	0.46	0.5279	MS	1	0.944444	S
Sheng39	0.96	0.0812	S	0.25	0.9	MR	0.92	0.725926	S
Sheng43	1	0.8974	S	1	1	S	0.88	0.729167	S
Sheng46	1	1	S	1	1	S	0.96	0.825397	S
Sheng57	0.67	0.7273	MS	0.75	0.6985	S	0.92	0.84375	S
Sheng58	1	1	S	1	1	S	1	0.9875	S
Sheng59	1	0.5938	S	0.88	1	S	1	1	S
Sheng62	0.83	0.7895	S	0.88	0.7219	S	0.21	0.0972222	MR
Sheng68	0.88	0.6725	S	0.79	0.8923	S	1	0.943452	S
Sheng70	0.67	0.9545	MS	1	0.6222	S	0.96	0.84375	S
Sheng74	0.92	0.053	S	0.25	0.8513	MR	1	0.925926	S
Sheng75	0.25	1	MR	1	0.6111	S	1	0.975	S
Sheng76	1	1	S	1	1	S	1	0.972222	S
Sheng79	0.92	0.8083	S	1	0.8772	S	0.83	0.75	S
Sheng82	1	0.872	S	0.92	0.7353	S	0.75	0.581597	S
Sheng85	1	0.9048	S	1	1	S	1	1	S
Sheng86	1	0.06	S	0.25	1	MR	1	0.85	S
Sheng87	1	0.8889	S	0.96	0.8594	S	0.92	0.854167	S
Sheng88	1	0.85	S	1	1	S	0.83	0.756944	S
Sheng90	1	0.9394	S	1	1	S	0.92	0.791667	S
Sheng93	1	0.5238	S	0.75	0.9176	S	0.96	0.928819	S
Sheng94	0.83	0.95	S	1	0.7956	S	0.58	0.392857	MS
Sheng103	0.88	0.6944	S	0.83	0.7788	S	1	1	S
Sheng107	0.88	0.5761	S	0.71	0.8542	S	1	1	S
Sheng115	1	1	S	1	1	S	1	0.8125	S
Sheng116	1	0.8333	S	1	0	S	0.92	0.766667	S
Sheng119	1	1	S	1	1	S	0.83	0.65625	S
Sheng125	1	0.0622	S	0.25	1		0.83	0.651786	S
Sheng126	1	0.6316	S	0.92	1	S	0.96	0.924769	S
Sheng131	1	0.8326	S	0.92	1	S	0.92	0.888889	S
Sheng135	0.27	0.0736	MR	0.25	0.0273	MR	0.23	0.0763	MR
Sheng140	1	0.8333	S	1	1	S	0.88	0	S
Sheng141	1	1	S	1	1	S	0.83	0.670635	S
Sheng142	1	0.8235	S	1	0.875	S	1	0.96131	S
Sheng147	0.83	0.4519	S	0.29	0.814	MR	0.79	0	S
Sheng148	0.88	0.0566	S	0.25	0.8297	MR	1	0.97619	S
Sheng154	0.32	0.0607	MR	0.25	0.0714	MR	0.92	0.732143	S
Sheng157	0.32	0.0656	MR	0.25	0.0128	MR	0.88	0.732143	S
Sheng160	0.5	1	MS	1	0.4231	S	1	1	S
Sheng171	1	0.875	S	0.96	0.6722	S	0.92	0.770833	S
Sheng172	1	0.6285	S	0.88	1	S	0.29	0.202381	MR
Sheng174	1	0.0477	S	0.25	1	MR	1	0.962963	S
Sheng183	0.3	0.1301	MR	0.33	1	MR	1	0.829545	S
Sheng194	0.29	0.1105	MR	0.38	0.1897	MR	0.75	0.629091	S
Sheng199	1	0.0572	S	0.25	0.7556	MR	0.83	0.738839	S
Sheng201	0.92	0.7963	S	0.79	0.9524	S	1	0.989583	S
Sheng204	0.83	0.2288	S	0.38	0.7879	MR	0.38	0.282573	MS
Sheng206	1	0.1667	S	0.29	0.7059	MR	1	0.958333	S
Sheng207	0.17	0.0575	MR	0.25	1	MR	0.08	0.0111111	MR
Sheng213	1	0.2825	S	0.41	1	MS	0.25	0.133929	MR
Sheng217	0.78	0.75	S	0.88	1	S	0.92	0.904762	S
Sheng219	0.28	0.0527	MR	0.25	1	MR	0.75	0.743492	S
Sheng231	0.79	0.88	S	0.88	0.6	S	0.75	0.725	S
Sheng232	0.34	0.059	MR	0.25	0.3784	MR	0.75	0.488426	S
Sheng284	0.31	0.0507	MR	0.25	0.2893	MR	0.79	0.604167	S
D209	1	0.0781	S	0.25	0.8222	MR	1	0.981481	S
D131	1	1	S	1	0.8786	S	1	0.0462963	S
D180	1	1	S	1	1	S	1	0.9	S
D45	1	0.8548	S	0.92	0.9298	S	0.92	0.65625	S
Hemai0302	1	0.0526	S	0.25	0.8039	MR	1	0.90625	S
Shi4185	0.63	0.3771	MS	0.58	0.3757	MS	1	0.954545	S
W120134	0.54	1	MS	1	0.5853	S	1	0.946429	S
W120283	1	0.8459	S	1	1	S	0.83	0.724537	S
W11031	1	0.881	S	0.96	1	S	1	0.925231	S
W110095	0.5	0.4211	MS	0.5	0.7353	MS	0.29	0.1289	MR
W110149	0.96	0.1729	S	0.33	0.9294	MR	0.38	0.212963	MS
9903322	0.25	0.2325	MR	0.38	0.1875	MR	0.21	0.0868056	MR
W110143	0.5	0.0496	MS	0.25	0.4246	MR	0.71	0.6	S
W110144	0.75	1	S	1	0.6711	S	1	0.981481	S
W110163	1	0.375	S	0.5	1	MS	0.96	0.892857	S
Sumai3	0.08	0.0021	R	0.12	0.02833	R	0.04	0.0213	R
Shannong102	0.38	0.6583	MR	0.39	0.5794	MR	0.36	0.4798	MR

## Sheet: Sheet5
207	1	1
17TBTJSUI
B1	1
B2	0.875
B3	0.96
B4	1
B5	1
B6	0.25
B7	0.29
B8	1
B9	1
B10	1
B11	1
B12	0.63
B13	0.42
B14	1
B15	1
B16	0.17
B17	0.96
B18	1
B19	0.96
B20	1
B21	1
B22	0.58
B23	0.33
B24	0.21
B25	0.58
B26	1
B27	1
B28	1
B29	0.75
B30	1
B31	1
B32	1
B33	0.96
B34	0.38
B35	1
B36	0.63
B37	1
B38	0.63
B39	0.45
B40	1
B41	0.25
B42	0.58
B43	1
B44	1
B45	1
B46	0.69
B47	0.43
B48	1
B49	0.54
B50	0.88
B51	1
B52	0.25
B53	0.83
B54	0.58
B55	0.88
B56	1
B57	1
B58	1
B59	0.88
B60	1
B61	0.67
B62	0.88
B63	0.75
B64	0.58
B65	1
B66	0.88
B67	1
B68	0.75
B69	0.75
B70	0.46
B71	1
B72	0.25
B73	0.79
B74	0.92
B75	0.92
B76	0.33
B77	0.71
B78	1
B79	0.75
B80	1
B81	1
B82	1
B83	1
B84	1
B85	1
B86	1
B87	1
B88	0.63
B89	0.96
B90	0.79
B91	0.92
B92	1
B93	0.79
B94	0.71
B95	0.79
B96	1
B97	0.75
B98	1
B99	1
B100	0.36
B101	1
B102	1
B103	1
B104	1
B105	0.23
B106	1
B107	1
B108	0.25
B109	1
B110	1
B111	1
B112	1
B113	0.45
B114	0.2
B115	0.92
B116	1
B117	0.83
B118	1
B119	-999
B120	1
B121	1
B122	0.78
B123	1
B124	1
B125	0.58
B126	1
B127	1
B128	1
B129	-999
B130	0.88
B131	1
B132	0.5
B133	1
B134	0.83
B135	0.75
B136	0.75
B137	0.96
B138	1
B139	1
B140	0.67
B141	1
B142	1
B143	0.83
B144	0.88
B145	0.67
B146	0.92
B147	0.25
B148	1
B149	0.92
B150	1
B151	1
B152	1
B153	1
B154	1
B155	1
B156	1
B157	0.83
B158	0.88
B159	0.88
B160	1
B161	1
B162	1
B163	1
B164	1
B165	1
B166	0.27
B167	1
B168	1
B169	1
B170	0.83
B171	0.88
B172	0.32
B173	0.32
B174	0.5
B175	1
B176	1
B177	1
B178	0.3
B179	0.29
B180	1
B181	0.92
B182	0.83
B183	1
B184	0.17
B185	1
B186	0.78
B187	0.28
B188	0.79
B189	0.34
B190	0.31
B191	1
B192	1
B193	1
B194	1
B195	1
B196	0.63
B197	0.54
B198	1
B199	1
B200	0.5
B201	0.96
B202	0.25
B203	0.5
B204	0.75
B205	1
B206	0.08
B207	0.38

## Sheet: Sheet6
207	1	1
17TBS
B1	1
B2	1
B3	0.96
B4	0.96
B5	0.96
B6	0.25
B7	0.38
B8	0.96
B9	1
B10	0.92
B11	1
B12	0.88
B13	0.33
B14	0.96
B15	0.67
B16	0.25
B17	1
B18	1
B19	0.5
B20	1
B21	1
B22	0.67
B23	0.5
B24	0.25
B25	1
B26	0.92
B27	0.58
B28	1
B29	0.92
B30	0.58
B31	0.83
B32	0.83
B33	0.88
B34	0.58
B35	1
B36	0.46
B37	0.83
B38	1
B39	0.46
B40	0.96
B41	0.25
B42	1
B43	0.25
B44	0.5
B45	0.96
B46	0.64
B47	0.45
B48	0.92
B49	1
B50	0.92
B51	0.88
B52	0.5
B53	1
B54	0.63
B55	0.83
B56	0.92
B57	1
B58	1
B59	0.88
B60	1
B61	1
B62	1
B63	1
B64	0.67
B65	1
B66	0.71
B67	0.92
B68	0.25
B69	0.25
B70	0.25
B71	0.38
B72	1
B73	1
B74	0.96
B75	1
B76	0.58
B77	0.88
B78	1
B79	0.42
B80	0.92
B81	0.96
B82	1
B83	1
B84	0.96
B85	0.83
B86	0.92
B87	1
B88	0.67
B89	0.75
B90	0.75
B91	1
B92	0.54
B93	0.42
B94	1
B95	0.75
B96	0.25
B97	0.71
B98	1
B99	1
B100	0.54
B101	1
B102	0.96
B103	0.92
B104	0.83
B105	0.33
B106	1
B107	0.25
B108	0.5
B109	1
B110	0.88
B111	0.29
B112	1
B113	0.5
B114	0.25
B115	1
B116	1
B117	1
B118	0.83
B119	0.58
B120	1
B121	1
B122	0.79
B123	0.83
B124	0.71
B125	0.46
B126	0.92
B127	0.71
B128	0.83
B129	1
B130	0.71
B131	0.5
B132	0.5
B133	0.92
B134	0.88
B135	0.63
B136	0.46
B137	0.25
B138	1
B139	1
B140	0.75
B141	1
B142	0.88
B143	0.88
B144	0.79
B145	1
B146	0.25
B147	1
B148	1
B149	1
B150	0.92
B151	1
B152	0.25
B153	0.96
B154	1
B155	1
B156	0.75
B157	1
B158	0.83
B159	0.71
B160	1
B161	1
B162	1
B163	0.25
B164	0.92
B165	0.92
B166	0.25
B167	1
B168	1
B169	1
B170	0.29
B171	0.25
B172	0.25
B173	0.25
B174	1
B175	0.96
B176	0.88
B177	0.25
B178	0.33
B179	0.38
B180	0.25
B181	0.79
B182	0.38
B183	0.29
B184	0.25
B185	0.41
B186	0.88
B187	0.25
B188	0.88
B189	0.25
B190	0.25
B191	0.25
B192	1
B193	1
B194	0.92
B195	0.25
B196	0.58
B197	1
B198	1
B199	0.96
B200	0.5
B201	0.33
B202	0.38
B203	0.25
B204	1
B205	0.5
B206	0.12
B207	0.39
